# Supplementary material for: Formative evaluation of an emergency department clinical decision support system for agitation symptoms: a study protocol
Source: PubMed Central journal article supplement — BMJ Open. 2024 Feb 19;14(2):e082834. doi: 10.1136/bmjopen-2023-082834 (PMC10882402; doi:10.1136/bmjopen-2023-082834), 2024-02-19
Supplement: bmjopen-2023-082834.draft_revisions.pdf [file bmjopen-2023-082834.draft_revisions.pdf]

# BMJ Open

BMJ Open is committed to open peer review. As part of this commitment we make the peer review history of every article we publish publicly available.

When an article is published we post the peer reviewers' comments and the authors' responses online. We also post the versions of the paper that were used during peer review. These are the versions that the peer review comments apply to.

The versions of the paper that follow are the versions that were submitted during the peer review process. They are not the versions of record or the final published versions. They should not be cited or distributed as the published version of this manuscript.

BMJ Open is an open access journal and the full, final, typeset and author-corrected version of record of the manuscript is available on our site with no access controls, subscription charges or pay-per-view fees (<http://bmjopen.bmj.com>).

If you have any questions on BMJ Open's open peer review process please email [info.bmjopen@bmj.com](mailto:info.bmjopen@bmj.com)

# BMJ Open

## Formative Evaluation of Emergency Department Clinical Decision Support for Agitation Symptoms: A Study Protocol

|                               |                                                                                                                                                                                                                                                                                                                                                                                                                                                                                                                                                                                                                                                                                                                                                                                                                                                                                                                                                                                                                                                                                                                                                                                                                                  |
|-------------------------------|----------------------------------------------------------------------------------------------------------------------------------------------------------------------------------------------------------------------------------------------------------------------------------------------------------------------------------------------------------------------------------------------------------------------------------------------------------------------------------------------------------------------------------------------------------------------------------------------------------------------------------------------------------------------------------------------------------------------------------------------------------------------------------------------------------------------------------------------------------------------------------------------------------------------------------------------------------------------------------------------------------------------------------------------------------------------------------------------------------------------------------------------------------------------------------------------------------------------------------|
| Journal:                      | <i>BMJ Open</i>                                                                                                                                                                                                                                                                                                                                                                                                                                                                                                                                                                                                                                                                                                                                                                                                                                                                                                                                                                                                                                                                                                                                                                                                                  |
| Manuscript ID                 | bmjopen-2023-082834                                                                                                                                                                                                                                                                                                                                                                                                                                                                                                                                                                                                                                                                                                                                                                                                                                                                                                                                                                                                                                                                                                                                                                                                              |
| Article Type:                 | Protocol                                                                                                                                                                                                                                                                                                                                                                                                                                                                                                                                                                                                                                                                                                                                                                                                                                                                                                                                                                                                                                                                                                                                                                                                                         |
| Date Submitted by the Author: | 05-Dec-2023                                                                                                                                                                                                                                                                                                                                                                                                                                                                                                                                                                                                                                                                                                                                                                                                                                                                                                                                                                                                                                                                                                                                                                                                                      |
| Complete List of Authors:     | <p>Wong, Ambrose; Yale New Haven Health System<br/> Nath, Bidisha; Department of Emergency Medicine, Yale School of Medicine<br/> Shah, Dhruvil; Department of Emergency Medicine, Yale School of Medicine<br/> Kumar, Anusha; Department of Emergency Medicine, Yale School of Medicine<br/> Brinker, Morgan; Department of Emergency Medicine, Yale School of Medicine<br/> Faustino, Isaac; Yale University, Emergency Medicine<br/> Boyce, Michael; Yale New Haven Health System<br/> Dziura, James; Department of Emergency Medicine, Yale School of Medicine; Department of Biostatistics, Yale School of Public Health<br/> Heckmann, Rebekah; Yale University, Department of Emergency Medicine<br/> Yonkers, Kimberly A.; University of Massachusetts System<br/> Bernstein, Steven L.; Dartmouth-Hitchcock Medical Center, Emergency Medicine<br/> Adapa, Karthik; University of North Carolina System, Carolina Health Informatics Program<br/> Taylor, Richard; Yale University, Emergency Medicine<br/> Ovchinnikova, Polina; Yale University School of Public Health<br/> McCall, Terika; Yale University School of Public Health<br/> Melnick, Edward; Yale University School of Medicine, Emergency Medicine</p> |
| Keywords:                     | <p>MENTAL HEALTH, PSYCHIATRY, Health informatics &lt; BIOTECHNOLOGY &amp; BIOINFORMATICS, Clinical Trial, ACCIDENT &amp; EMERGENCY MEDICINE, Information technology &lt; BIOTECHNOLOGY &amp; BIOINFORMATICS</p>                                                                                                                                                                                                                                                                                                                                                                                                                                                                                                                                                                                                                                                                                                                                                                                                                                                                                                                                                                                                                  |
|                               |                                                                                                                                                                                                                                                                                                                                                                                                                                                                                                                                                                                                                                                                                                                                                                                                                                                                                                                                                                                                                                                                                                                                                                                                                                  |

SCHOLARONE™  
Manuscripts

# Formative Evaluation of Emergency Department Clinical Decision Support for Agitation Symptoms: A Study Protocol

Ambrose H. Wong, MD, MEd, MHS<sup>1,3</sup>; Bidisha Nath, MBBS, MPH<sup>1</sup>; Dhruvil Shah, BS<sup>1</sup>; Anusha Kumar, ScM<sup>1</sup>; Morgan Brinker, BA<sup>1</sup>; Isaac V. Faustino, MS<sup>1</sup>; James D. Dziura, MPH, PhD<sup>1,2</sup>; Rebekah Heckmann, MD, MPH, MPA<sup>1,3,4</sup>, MPA; Kimberly A. Yonkers, MD<sup>5</sup>; Steven L. Bernstein, MD<sup>6</sup>; Karthik Adapa, PhD, MBBS, MPP, MPH<sup>7</sup>; Michael Boyce, PhD<sup>1,3</sup>; R. Andrew Taylor, MD, MHS<sup>1,2,3</sup>; Polina Ovchinnikova, BS<sup>8</sup>; Terika McCall, PhD, MPH, MBA<sup>2,8,9</sup>; Edward R. Melnick, MD, MHS<sup>1,2,3,8</sup>

## Corresponding author:

Ambrose H Wong, MD, MEd, MHS  
Yale School of Medicine  
Department of Emergency Medicine  
464 Congress Avenue Suite 260  
New Haven, CT  
United States of America 06519  
Office: 203-737-2489; Fax: 203-785-4580  
Email: [wongambrose@gmail.com](mailto:wongambrose@gmail.com)

## Author Affiliations:

<sup>1</sup>Department of Emergency Medicine, Yale School of Medicine, New Haven, CT, USA

<sup>2</sup>Department of Biostatistics, Yale School of Public Health, New Haven, CT, USA

<sup>3</sup>Yale-New Haven Health System, New Haven, CT, USA

<sup>4</sup>Center for Outcomes Research & Evaluation (CORE), Yale School of Medicine, New Haven, CT, USA

<sup>5</sup>Department of Psychiatry, University of Massachusetts Chan Medical School, Worcester, MA, USA

<sup>6</sup>Department of Emergency Medicine, Geisel School of Medicine at Dartmouth, Lebanon, NH, USA

<sup>7</sup>Department of Radiation Oncology, The University of North Carolina at Chapel Hill, Chapel Hill, NC, USA

<sup>8</sup>Section of Biomedical Informatics and Data Science, Yale School of Medicine, New Haven, CT, USA

<sup>9</sup>Center for Interdisciplinary Research on AIDS (CIRA), Yale School of Public Health, New Haven, CT, USA

Word Count: 3,968

Keywords: mental health; emergency medicine; psychiatry; agitation; teamwork; dissemination and implementation; health services research; protocol; decision support; health informatics; clinical trial

## ABSTRACT

### Introduction

The burden of mental health related visits to emergency departments (EDs) is growing, and agitation episodes are prevalent with such visits. Best practice guidance from experts recommends early assessment of at-risk populations and pre-emptive intervention using de-escalation techniques to prevent agitation. Time pressure, fluctuating work demands, and other systems-related factors pose challenges to efficient decision-making and adoption of best practice recommendations during an unfolding behavioral crisis. As such, we propose to design, develop, and evaluate a computerized clinical decision support (CDS) system, "Early Detection and Treatment to Reduce Events with Agitation Tool," (**ED-TREAT**). We aim to identify patients at risk of agitation and guide ED clinicians through appropriate risk assessment and timely interventions to prevent agitation with a goal of minimizing restraint use and improving patient experience and outcomes.

### Methods and Analysis

This will be a formative evaluation of the health-record embedded CDS tool through three phases of iterative development and refinement. We will first (1) apply user-centered qualitative methods such as contextual inquiry and focus groups to assess needs of key stakeholders (ED physicians, nurses, technicians, and patients with lived experience of restraints and behavioral crises) to identify essential user requirements, (2) usability testing with "think-aloud" and simulation sessions, and (3) field testing in the clinical environment. Next, we will conduct a pilot randomized controlled trial at two sites within our health system to evaluate feasibility, fidelity, and bedside acceptability of the intervention prototype.

### Ethics and Dissemination

Ethical approval by the Yale University Human Investigation Committee was obtained in 2021 (HIC# 2000030893 and 2000030906). All participants will provide informed verbal consent prior to being enrolled in the study. Results will be disseminated through publications in open-access, peer-reviewed journals, via scientific presentations, or through direct email notifications. The pilot trial was registered on clinicaltrials.gov (NCT04959279).

## ARTICLE SUMMARY

### Strengths and Limitations of this Study

- This is one of the first studies to develop and evaluate a clinical decision support (CDS) system to facilitate management of agitation in an acute care setting.
- Our tool will include pragmatic strategies to implement best practice recommendations for risk assessment and timely de-escalation techniques in agitation management *prior* to definitive psychiatric treatment.
- The CDS design process will follow an iterative, user-centered approach with feedback from end-users at every step to refine and develop an electronic health record-embedded, fully functional prototype.
- Our risk assessment data, qualitative design, and pilot trial will arise from the same geo-political area and health system, which may limit generalizability.

## 1 INTRODUCTION

2  
3  
4  
5 Behavioral health related visits to emergency departments (EDs) are growing.<sup>1-3</sup> Agitation, defined as  
6 excessive psychomotor activity leading to aggressive and violent behavior,<sup>4</sup> is a frequent symptom of  
7 such visits. An estimated 1.7 million agitation episodes occur annually in EDs across the United States  
8 alone.<sup>5,6</sup> When an individual becomes agitated, they may cause harm to themselves, hospital staff, and  
9 property.<sup>7-9</sup> Rapid management of agitation is imperative and use of physical restraint may be necessary to  
10 facilitate patient assessment and prevent injury.<sup>5</sup> Although physical restraints are routinely used in the  
11 ED,<sup>10,11</sup> they are associated with up to 37% risk of injury in patients, including blunt chest trauma,  
12 asphyxiation, respiratory depression, to sudden death.<sup>12-17</sup> To address these challenges, the American  
13 Association for Emergency Psychiatry sponsored Project BETA (Best Practices in Evaluation and  
14 Treatment of Agitation).<sup>18</sup> Project BETA was a pioneer effort to create a comprehensive list of five sets of  
15 best practices for preventing and managing agitation through multidisciplinary consensus panels. Key  
16 strategies within Project BETA included use of structured risk assessment<sup>4</sup> to help clinicians screen  
17 patients at risk of developing agitation and pre-emptive intervention using behavioral techniques,<sup>19</sup>  
18 environmental modification,<sup>20</sup> and consensual use of medication therapy<sup>18</sup> to obviate use of restraints.

19  
20  
21  
22  
23  
24  
25  
26  
27  
28  
29  
30  
31  
32  
33  
34  
35  
36  
37  
38  
39  
40  
41  
42  
43  
44  
45  
46  
47  
48  
49  
50  
51  
52  
53  
54  
55  
56  
57  
58  
59  
60  
Despite these established best practice recommendations, multiple systems level barriers challenge their  
practical implementation.<sup>21-23</sup> Care delivery in the ED occurs in a uniquely complex environment. Clinical  
decisions are made under time pressure, using limited information, and amidst multiple and frequent  
interruptions and other unpredictable factors due to the dynamic course of acute, undifferentiated  
conditions.<sup>24</sup> As burden on the emergency care system rises in the U.S.,<sup>25-28</sup> these systems-level  
challenges are particularly relevant for patients at risk for agitation, as behavioral and de-escalation  
techniques require investment in time and effort to build a strong rapport and trusting therapeutic  
relationship with the patient. Given that clinicians may have difficulty accurately identifying patients at  
risk for agitation and access to expert psychiatric evaluation in such settings may be limited,<sup>29-32</sup> there is a  
significant mismatch between resources available and application of those resources to individuals who  
would most benefit from early risk assessment and intervention. A recent prospective study observing 100  
at-risk patients in the ED found that over 60% of individuals develop agitation more than 30 minutes into  
their visit,<sup>33-35</sup> presenting opportunities to prevent agitation earlier in the course.

61  
62  
63  
64  
65  
66  
67  
68  
69  
70  
Clinical decision support (CDS) tools can help address systems-based challenges, facilitate risk  
assessment, and guide clinicians to use best practices strategies recommended by Project BETA in the

1 34 ED. CDS tools show increasing promise in the emergency setting to help clinical staff identify high-risk  
2 35 patients and provide more efficient and higher quality of care,<sup>36</sup> including individuals requiring use of  
3 36 high-cost imaging<sup>37</sup> and older adults.<sup>38-41</sup> A CDS system encompasses any on-screen tool designed to  
4 37 improve healthcare delivery by enhancing medical decisions with targeted clinical knowledge, patient  
5 38 data, and other health-related information.<sup>42</sup> Use of a CDS tool to assist in assessment and management of  
6 39 potentially agitated patients may be an effective strategy in the ED.<sup>40,43,44</sup>  
7 40

## 13 41 **Rationale and Aims of Study**

15 42  
16 43 This study is one of the first that aims to prevent agitation and improve outcomes for ED patients with  
17 44 agitation. We will achieve this by (**Figure 1**):  
18 45

- 22 46 1. Designing and developing an EHR-embedded, user-centered, CDS system, “Early Detection and  
23 47 Treatment to Reduce Events with Agitation Tool” (**ED-TREAT**), using a contextual design  
24 48 approach to obtain input from key stakeholders and iterative user-centered design process; and  
25 49  
26 50
- 27 51 2. Conducting a pilot study to evaluate the feasibility, fidelity, and bedside acceptability of ED-  
28 52 TREAT. ED-TREAT aims to help ED staff and clinicians to identify patients at high-risk for  
29 53 developing agitation, guide them through appropriate risk assessment and efficient decision-  
30 54 making to implement best practice recommendations to prevent development of agitation, and  
31 55 minimize use of restraints.  
32 56  
33 57  
34 58  
35 59  
36 60  
37 61  
38 62

39 63 We hypothesize that, with the use of ED-TREAT, ED staff will be able to identify at-risk individuals,  
40 64 conduct appropriate risk-assessment, implement interventions to minimize use of restraints and improve  
41 65 patient experience and outcomes related to agitation management in the ED. If this study is successful, a  
42 66 planned subsequent clinical effectiveness trial will compare effectiveness of ED-TREAT to usual care  
43 67 across multiple ED sites in the future. The long-term goal of this CDS tool is to increase fidelity with best  
44 68 practice recommendations for prevention of agitation through early use of behavioral techniques prior to  
45 69 onset of agitation.  
46 70  
47 71  
48 72  
49 73  
50 74  
51 75  
52 76

## 53 64 **METHODS AND ANALYSIS**

### 54 65 **Patient and Public Involvement**

1 67  
2  
3 68 We invited patients to help us design, develop, and test the intervention so that it is designed to improve  
4  
5 69 the public good and help individuals with lived experience of mental illness and behavioral crises. In  
6  
7 70 addition, we will solicit patient feedback and guidance on dissemination of study results to participants  
8  
9 71 and the local community through networks at our affiliated community-based organizations that have had  
10 72 sustained engagement with our team for several years to implement a research agenda in agitation care  
11  
12 73 that is patient-centered and recovery-oriented.  
13  
14 74

### 15 75 **Aim 1: Developing and Refining ED-TREAT**

16  
17 76

18  
19 77 With the goal of developing a final prototype that maximizes usability, staff self-efficacy, satisfaction,  
20 78 and patient-centered care, ED-TREAT will be designed, developed, and refined in three phases (P1-P3)  
21  
22 79 (**Figure 2**). During phase 1 (P1), we will conduct a needs assessment to collect input from key  
23  
24 80 stakeholders including ED physicians, nurses, patient care technicians, behavioral health experts,  
25  
26 81 informatics experts, and patients with lived experience of being in restraints in the ED. We will combine  
27 82 needs assessment findings with Project BETA recommendations for agitation management in the ED<sup>5</sup> and  
28  
29 83 risk factors for agitation from the literature to design an initial prototype. Next, in phase 2 (P2), we will  
30  
31 84 conduct formative usability testing, which will consist of "think aloud" protocols, a standard usability  
32  
33 85 procedure for CDS design<sup>45</sup>, with clinician users and standardized patients in a controlled simulation  
34 86 setting to guide further modifications of the tool in an iterative fashion. Finally, in phase 3 (P3), we will  
35  
36 87 conduct field testing in the ED through observational workflow analyses to identify and address barriers  
37  
38 88 in the real-world clinical environment.  
39  
40 89

### 41 90 Participant Recruitment

42  
43 91

44  
45 92 We will design ED-TREAT for use by staff members that work mostly closely with agitated patients in  
46 93 the ED.<sup>7,35,46-48</sup> These consist of ED physicians, nurses, and patient care technicians. We plan to recruit  
47  
48 94 these staff participants via email and biweekly staff meetings. In addition, we will also recruit patients  
49  
50 95 with prior lived experience of being restrained in the ED to solicit their input and ensure that patient-  
51  
52 96 centered practices are considered during the design process. We will recruit these patients from the pool  
53 97 of peer support workers from local community-based recovery organizations via email and presentations  
54  
55 98 at monthly staff meetings. These peer support workers have a history of mental health and substance use  
56  
57 99 disorders and have received training to become employed as patient advocates on community-based  
58  
59  
60

1 100 treatment teams. Finally, our design team will interview informatics and behavioral health experts to  
2 101 solicit ideas and relevant CDS design strategies to improve decision-making during agitation  
3 102 management.<sup>49,50</sup>

### 8 104 Phase 1: Needs Assessment and Initial Design of ED-TREAT

10 105  
11 106 We will conduct focus groups and observations starting June 2023 via a contextual inquiry<sup>36</sup> approach.  
12 107 This approach seeks to engage prospective users and participants described above to understand clinical  
13 108 workflow, roles of different members of the patient care team, and thought processes involved in  
14 109 managing a behavioral health crisis in the ED. We will first conduct in-depth qualitative interviews with  
15 110 staff and patient participants using a semi-structured interview guide that will include open-ended  
16 111 questions to cover topics (**Supplemental Table 1**) related to application of Project BETA  
17 112 recommendations in preventing agitation and user-centered design.<sup>37</sup> Each focus group will consist of 2-5  
18 113 participants from the same stakeholder group and be approximately 60 minutes duration. Sessions will be  
19 114 audio recorded after obtaining participant verbal consent. In addition, members of the design team will  
20 115 conduct observation sessions in the ED to observe ED staff during real-life agitation management events.  
21 116 These sessions will provide information about environmental and systems contexts, interactions amongst  
22 117 members of patient care team during an active agitation episode, logistics of integrating CDS tool into  
23 118 EHR workflow to facilitate clinical decision-making.

24 119  
25 120 After identifying crucial user requirements in P1, we will develop an initial low-fidelity prototype for ED-  
26 121 TREAT. This will occur in collaboration with EHR analysts and informatics experts by incorporating  
27 122 Project BETA recommendations for preventing and managing agitation<sup>5</sup> and potential risk factors for  
28 123 agitation to identify potential at-risk patients in the ED. These risk factors (**Supplemental Table 2**) will  
29 124 be based on existing literature on risk factors for agitation and workplace violence in the healthcare  
30 125 setting<sup>4,42,51</sup> our team's prior work on agitation management in the ED,<sup>48</sup> patient perspectives of ED visits  
31 126 resulting in restraint use,<sup>52</sup> characterization of physical restraint use among adults presenting to the ED  
32 127 with agitation,<sup>11</sup> and attributes and levels of agitation impacting thresholds for restraint use in the ED.<sup>34,35</sup>

33 128  
34 129 Preliminary work by our team has shown that identifying risk factors for agitation and implementing  
35 130 EHR-based interventions for agitation are feasible in the emergency setting.<sup>46</sup> The CDS will extract  
36 131 patient specific data on variables of interest from existing patient chart data via EPIC's Cogito analytics  
37 132 performance suite.<sup>53</sup> Based on current expert recommendations from Project BETA<sup>46</sup>, we anticipate that



ED-TREAT will likely stratify patients into three risk groups (**Table 1**) and recommend increasing levels of resource utilization and pre-emptive management as the risk level increases based on best practices for preventing agitation from Project BETA. Depending on results from the needs assessment, ED-TREAT's recommendations may include automated order sets for medication therapy, staff instructions and communication orders, and templated clinical documentation. Our team will collaborate with EHR analysts to create an initial interactive prototype within the EHR testing environment, "Epic Playground", a non-production, functional, simulated EHR replica used for developing and validating new workflows. We anticipate that our final product will be an EHR-integrated web application through a dedicated graphical Application Programming Interface.<sup>54</sup>

| Risk Level       | Project BETA <sup>5</sup> guidelines                                                                                        | Recommended tasks                                                                                                                                                                                                                                                          |
|------------------|-----------------------------------------------------------------------------------------------------------------------------|----------------------------------------------------------------------------------------------------------------------------------------------------------------------------------------------------------------------------------------------------------------------------|
| Negligible       | (1) Medical evaluation & triage <sup>13</sup>                                                                               | <ul style="list-style-type: none"> <li>Medical history &amp; physical exam</li> <li>Early vital signs and fingerstick glucose</li> <li>Address psychosocial needs &amp; establish rapport</li> <li>Standardize assessment to avoid structural biases/inequities</li> </ul> |
| Mild to moderate | (2) Psychiatric evaluation & risk assessment <sup>55</sup><br>(3) Psychopharmacology <sup>18</sup>                          | <u>Tasks in negligible risk level PLUS:</u> <ul style="list-style-type: none"> <li>Measure Behavioral Activity Rating Scale (BARS)<sup>56</sup></li> <li>Offer voluntary oral medication (with allergies cross-checked)</li> </ul>                                         |
| High             | (4) Environmental modification (avoidance of restraint & seclusion) <sup>20</sup><br>(5) Verbal de-escalation <sup>19</sup> | <u>Tasks in mild to moderate risk level PLUS:</u> <ul style="list-style-type: none"> <li>Alert clinician early (from triage/nursing assessment)</li> <li>Pre-emptive verbal de-escalation (ten domains)</li> <li>Move to quiet, low activity/volume area</li> </ul>        |

## Phase 2: Usability Testing of ED-TREAT

### *Heuristic Evaluation*

We will first perform heuristic evaluation<sup>57</sup> of CDS interface usability before testing with clinician participants. This will consist of an expert team of three evaluators with experience in emergency medicine as well as CDS design who will navigate through different aspects of the CDS and judge the compliance and usability of the tool in agitation management triangulated between their expertise and usability standards. Each evaluator will inspect the interface and assess the guidelines and recommendations provided by the CDS for various levels of agitation. After individual assessment is completed, we will debrief as a group and aggregate the results of each evaluator to examine deficiencies

1 155 in the prototype design. After addressing concerns and refining the prototype CDS tool, we will conduct  
2 156 further usability testing with clinicians in simulated training protocols.  
3  
4

### 5 157 6 7 158 *“Think Aloud” Protocol*

8 159  
9  
10 160 Next, our team will perform one-on-one "think aloud" protocol<sup>45</sup> sessions with clinician users in a quiet  
11  
12 161 office at the EHR training classroom. We will ask participants to perform designated tasks with ED-  
13  
14 162 TREAT using mock patient charts in Epic Playground and “think aloud” how they would use ED-TREAT  
15  
16 163 to test whether the user understands and is using the CDS as intended. We will develop a facilitator guide  
17 164 that focuses on domains related to usability of the prototype and design of the CDS interface  
18  
19 165 (**Supplemental Table 3**). We will video-record each usability testing session, incorporating user screen  
20  
21 166 captures and field notes<sup>58</sup> taken during the session. At the end of the session, each participant will  
22 167 complete the System Usability Scale<sup>59</sup> to measure perceived usability of and satisfaction with a health  
23  
24 168 informatics tool. The System Usability Scale is a widely used and effective survey composed of ten  
25  
26 169 statements assessed on a 5-point Likert scale, with inter-item correlations of 0.69-0.75 and a reliability  
27 170 coefficient  $\alpha$  of 0.91.<sup>60</sup> Each session is expected to take 30 minutes.  
28

### 29 171 30 31 172 *Simulation Sessions*

32  
33 173  
34 174 Additionally, we will observe the clinical team in a simulation session with a live actor or mannequin  
35  
36 175 simulating being an agitated patient. Participants will be briefed on how the CDS tool works and will be  
37  
38 176 encouraged to use it at various points in the care process. We will similarly video-record each session and  
39  
40 177 distribute the System Usability Scale to gather participant feedback. We will make iterative refinements to  
41 178 the prototype until the team reaches consensus that it has reached a threshold level of usability.  
42  
43 179

### 44 45 180 Phase 3: Field Testing of ED-TREAT

46 181  
47  
48 182 We will recruit staff participants working in the ED for field testing of the ED-TREAT prototype through  
49  
50 183 observational workflow analysis of ED visits with mild-moderate or high risk of agitation (**Table 1**). We  
51  
52 184 will develop an observational guide based on sample topics of usability testing (**Supplemental Table 3**)  
53 185 that will detail both the workflow of managing an at-risk patient and barriers to adopting ED-TREAT in  
54  
55 186 the clinical environment. Field notes will detail events, actions, and their time and duration,<sup>58</sup> while  
56  
57 187 maintaining an open-ended format to describe and follow variations or workarounds in workflow. Either  
58  
59  
60

1 188 the PI or a trained research associate will complete the observations as an unobtrusive non-participant  
2 189 observer through a patient's visit from ED arrival to patient disposition, similar to procedures we  
3 190 developed for prior observations of agitation.<sup>34,35</sup> We will enter field notes using a portable electronic  
4 191 tablet into a word document for free text and a spreadsheet for data elements.

### 8 192 9 10 193 Data Analysis

11 194  
12  
13 195 In P1 (design and development), our team will use the iterative and phased approach of building an  
14 196 affinity diagram, a commonly used organizational tool that allows large numbers of ideas stemming from  
15 197 brainstorming and qualitative data to be sorted into groups, based on their natural relationships, for review  
16 198 and analysis.<sup>61,62</sup> Following completion of each focus group and contextual inquiry session, we will  
17 199 conduct an interpretation session to review the user-provided key notes from the inquiry session and  
18 200 capture them as affinity notes.<sup>63</sup> To help identify common issues, work patterns, and needs, we will  
19 201 arrange the affinity notes into hierarchical categories ("must-have," "good to have", and "nice to have")  
20 202 based on common themes in the data to create an affinity diagram.<sup>63</sup> Building of the affinity diagram will  
21 203 occur online using Miro software (RealtimeBoard, Inc, San Francisco, CA, United States).<sup>64</sup> We will  
22 204 mock up a low fidelity prototype of ED-TREAT based on current best practices and iteratively refine it  
23 205 based on user data from P1.

24 206  
25  
26 207 For P2 (usability testing) and P3 (field testing), field notes will be analyzed using a deductive coding  
27 208 method to conduct directed content analysis<sup>65</sup> based on predetermined usability requirements and  
28 209 recommended tasks from ED-TREAT (**Supplemental Table 3**).<sup>66</sup> We will use Dedoose (SocioCultural  
29 210 Research Consultants, Manhattan Beach, CA, United States),<sup>67</sup> a collaborative and cloud-based qualitative  
30 211 software package, for thematic analysis and data organization of transcripts. Codes identifying suboptimal  
31 212 or deficient performance of the prototype will uncover critical system factors impacting adoption and  
32 213 usability that need optimization and adjustment. Two trained reviewers will perform independent coding  
33 214 and we will calculate inter-rater reliability assessments with kappa scores. For the System Usability  
34 215 Scale,<sup>59</sup> participants' scores from each question of are added together and then multiplied by 2.5 to  
35 216 convert the original scores to continuous data from 0-100. Scores will be described using mean and  
36 217 standard deviation and >85 will be indicative of excellent usability.<sup>68</sup> We will use the results generated  
37 218 from this analysis process at each round of revisions to make appropriate adjustments to the ED-TREAT  
38 219 prototype in close collaboration with the EHR analyst team until we derive a final deliverable prototype  
39 220 that will be ready for the pilot trial.

## Sample Size

We will use purposive sampling<sup>69</sup> to ensure the full spectrum of perspectives for clinicians who will engage with ED-TREAT and peer support workers who have had experience as patients in the ED. We will conduct data collection until reaching thematic saturation,<sup>70</sup> when new concepts no longer emerge from iterative analysis of the data.<sup>71</sup> For initial design (P1), we anticipate that this will occur after five to six focus groups with six participants (staff and patients) in each focus group.<sup>72</sup> As enrollment of 10-12 subjects can identify up to 90% of usability problems,<sup>73</sup> we will perform usability testing (P2) for approximately five participants in each round of refinement and expect about three rounds of refinement (15 participants total) as per our prior published work.<sup>74</sup> For field testing (P3), we plan to observe eight patient encounters to detect any usability problems when deployed in the ED.

## **Aim 2: Pilot Trial and Feasibility Testing for ED-TREAT**

We will conduct a pilot randomized control trial for ED-TREAT to compare the intervention to usual care. This will allow us to evaluate acceptability of the intervention to its end-users (ED staff), fidelity of its intended outcomes to identify at-risk individuals and prevent agitation, feasibility of randomization, ease of subject enrollment, and measurement of other outcomes of interest. This will be a mixed methods study, wherein we will quantitatively measure usability and efficiency of clinical decision-making via the System Usability Scale<sup>59</sup> and specific patient outcomes, as well as qualitatively assess the effect of ED-TREAT on clinical workflow and patient care. In addition, this pilot trial will (1) test the integrity of the study protocol in preparation for a future comparative effectiveness clinical trial, (2) evaluate randomization protocols, (3) estimate rates of recruitment and retention of trial subjects, and (4) estimate effect size for sample size calculation in the subsequent trial.<sup>75</sup> Pilot trials<sup>76</sup> are not designed to test the efficacy of the intervention, but will help establish acceptability and feasibility in preparation for a future multicenter RCT. We hypothesize that it will be feasible to implement the tool, measure identified outcomes, be acceptable to its end-users, and work as intended.

## Study Setting, Participants, and Randomization

We will conduct the pilot trial at two adult ED campuses that belong to a large regional healthcare system in the Northeast United States, with a planned trial start date in the Fall of 2024. Prior to initiation of the

1 254 pilot trial, all emergency physicians, ED nurses, and ED patient care technicians at both campuses will  
2  
3 255 receive an email introduction and a link to a brief training regarding the use of ED-TREAT. Eligibility  
4  
5 256 criteria for patients and recruitment will include ability to provide verbal consent for the study and a score  
6  
7 257 of “4” (quiet and awake; normal level of activity) or less on the Behavioral Activity Rating Scale  
8  
9 258 (BARS),<sup>56</sup> an accepted seven-point scale to assess levels of agitation in acute care settings. We will first  
10  
11 259 perform screening for eligibility via an ED-TREAT administrative interface that performs risk assessment  
12  
13 260 for each ED patient on arrival. A research associate will then approach eligible patients and their  
14  
15 261 designated clinician team members for enrollment after confirming ability to consent and assessing  
16  
17 262 patient BARS scores as close to the beginning of the visit as feasible. Study procedures, risks/benefits of  
18  
19 263 participating, and the purpose of ED-TREAT will be described, and verbal consent will be obtained for  
20  
21 264 patients and staff participants. Since we plan to enroll patients prior to onset of agitation, we anticipate  
22  
23 265 that most patients should be able to engage in decisions and provide verbal consent. Our prior work found  
24  
25 266 that >70% of ED patients with subsequent agitation arrived with a normal mental status and BARS scores  
26  
27 267  $\leq 4$ .<sup>34,35</sup> We will perform 2:1 randomization at the patient level and also recruit a higher proportion of  
28  
29 268 high-risk patients in each arm, as a primary aim of the pilot trial is to test the acceptability of ED-TREAT  
30  
31 269 and we anticipate that our intervention will recommend more tasks for high-risk patients. Randomization  
32  
33 270 will occur using sequentially numbered, opaque, sealed envelopes that will only be opened by the  
34  
35 271 research team member after enrollment of each patient. In the intervention group, ED-TREAT will  
36  
37 272 automatically launch as part of the clinical team’s workflow in the EHR after randomization. We  
38  
39 273 anticipate that critical steps in ED-TREAT will occur at four stages of a visit (**Figure 3**): (1) at initial  
40  
41 274 arrival with automated risk stratification using pre-determined criteria set during the CDS design process;  
42  
43 275 (2) at triage assessment; (3) at initial nurse interaction; and (4) at initial clinician interaction. In the control  
44  
45 276 group, ED-TREAT will notify the research team regarding the patient’s risk group but will not launch for  
46  
47 277 the clinical team’s interfaces.

#### 44 279 Data collection

48 280  
49 281 Our anticipated data collection strategy is summarized in **Table 2**. In addition to visit characteristics  
50 282 (system factors, relevant clinical data) collected through the EHR during the visit, we will collect  
51 283 acceptability and fidelity measures, feasibility assessment, and potential outcomes of interest for each  
52 284 visit.  
53 285  
54  
55  
56  
57  
58  
59  
60

*Acceptability & fidelity.* For all clinicians caring for patients in the intervention group, we will administer the System Usability Scale (SUS)<sup>59</sup> either in person at the end of the ED visit or within 72 hours by email. In addition, we will perform observation workflow analyses as described earlier using a task checklist to determine if clinicians were using ED-TREAT as intended, and if any barriers or unintended consequences occurred because of the intervention. We will perform brief, semi-structured interviews with patients either at the end of a visit or within one week after disposition to evaluate the impact of ED-TREAT on their experiences.

*Feasibility.* To assess the feasibility of a comparative effectiveness trial, we will evaluate the following at three-month intervals: 1) available number of potential subjects (# of eligible patient visits), 2) subject identification (% of eligible patients/staff approached), 3) enrollment (% of patients/staff with consent to enroll), and 4) retention (% of visits with completed outcome measures). We will also conduct brief, semi-structured interviews with staff participants to evaluate their experiences with ED-TREAT and effect on clinical workflow.

*Outcome measures.* The anticipated primary outcome of the comparative effectiveness trial will be the presence of a physical restraint order during the ED visit (> 30 minutes after arrival). Additional secondary outcomes include the presence of an intramuscular chemical sedative order, highest level of agitation on the Behavioral Activity Rating Scale (BARS)<sup>56</sup> during visit, disposition, and length of stay.

Table 2. Anticipated data collection for ED-TREAT pilot trial

| Measure                                  | Tool or strategy                                                       | Timing of measurement            |
|------------------------------------------|------------------------------------------------------------------------|----------------------------------|
| <i>Visit characteristics</i>             |                                                                        |                                  |
| System factors                           | EHR (e.g., staff traits, National ED Overcrowding Scale) <sup>77</sup> | During & end of visit            |
| Clinical data                            | EHR/ED-TREAT (e.g., risk category; see also Table 2)                   | During & end of visit            |
| <i>Acceptability, fidelity</i>           |                                                                        |                                  |
| Clinician acceptability of ED-TREAT      | System Usability Scale <sup>59</sup> (satisfied, useful)               | End of visit                     |
| Fidelity of ED-TREAT                     | Observational workflow checklist (perform as intended)                 | During visit                     |
| Effect on patient experience             | Qualitative interviews with patients                                   | End of visit or <72h after visit |
| Potential bias or differential treatment | Implicit Association Test (for clinicians), patient interviews         | End of visit or <72h after visit |
| <i>Feasibility</i>                       |                                                                        |                                  |
| Available subjects                       | # of eligible visits                                                   | Every 3 months                   |
| Subject identification                   | % eligible visits approached                                           | Every 3 months                   |
| Enrollment                               | % visits with consent to enroll from patient/clinical staff            | Every 3 months                   |
| Retention                                | % visits with completed measures                                       | Every 3 months                   |
| Effect on clinical workflow              | Qualitative interviews with clinicians                                 | Every 3 months                   |
| <i>Outcomes</i>                          |                                                                        |                                  |

|                                       |                                                       |                            |
|---------------------------------------|-------------------------------------------------------|----------------------------|
| Physical restraint order              | EHR                                                   | During & end of visit      |
| Intramuscular chemical sedative order | EHR                                                   | During & end of visit      |
| Level of agitation                    | Behavioral Activity Rating Scale (BARS) <sup>56</sup> | Highest level during visit |
| Disposition                           | EHR                                                   | End of visit               |
| Length of stay                        | EHR                                                   | End of visit               |

### Sample size and Data Analysis

As this pilot trial is not designed to test the efficacy of ED-TREAT, a power calculation is not appropriate.<sup>75</sup> To determine the sample size for this pilot randomized trial, we will use the outcome of fidelity as measured by the proportion of visits in the intervention arm that are adherent to >80% of the observational workflow checklist. To estimate the proportion achieving this level of fidelity with a reasonable precision (95% CI with a width of +/- 20%), a total of at least 26 eligible subjects will be enrolled in the pilot trial. We will determine ratings from the System Usability Scale<sup>59</sup> and calculate proportions of each clinician group with scores of >85, indicating excellent usability. We will consider ED-TREAT to be acceptable if  $\geq 90\%$  of each clinician group give ratings >85. For feasibility, we will measure the proportion of potentially eligible patient visits with successful enrollment and collection of all outcomes of interest. Based on our group's anecdotal experience with pilot studies, we will consider a comparative effectiveness trial feasible if  $\geq 30\%$  of visits assessed for eligibility are enrolled and  $\geq 90\%$  of all outcome measures are collected. Qualitative data obtained from interviews will be analyzed with Dedoose using the analytic strategy mentioned earlier for iterative refinement of the study protocol in preparation for a comparative effectiveness trial.

### ETHICS AND DISSEMINATION

We plan to conduct our study in accordance with the Yale Institutional Review Board (IRB). We have obtained the necessary regulatory and human subjects protection approvals for each aspect or phase of our protocol. As we work with structured EHR patient data, we will maintain de-identification where necessary and keep access to datasets secure. Additionally, all clinicians and patients participating in focus groups, feasibility testing, or the pilot trial will be informed of their rights as subjects. Clinicians will retain the right to retain control of their practice and patients will retain the right to not participate and request termination of participation at any point in the study. All staff, participants, and patients will provide verbal consent prior to involvement with the study and a study exemption determination has been

1 334 granted by the Yale IRB for the design and development of ED-TREAT. Our clinical trial has been  
2 335 reviewed and approved (Clinical Trials Registration Number: NCT04959279).  
3 336  
4

5 336  
6  
7 337 Monitoring for data integrity and safety will be the responsibility of principal investigator (AHW) and the  
8 338 Yale Human Investigation Committee, and a Data Safety Monitoring Board (DSMB). DSMB members  
9 339 will be composed of experts in care disparities and health equity for vulnerable and disadvantaged  
10 340 populations, clinical trials for mental illness and substance use disorders, measurement and risk  
11 341 stratification for disinhibited behaviors, and an expert in statistical analysis of clinical trials in emergency  
12 342 medicine. Twice annually, the DSMB will review the progress of the study and frequency of serious  
13 343 adverse events. All adverse events, as well as any unanticipated problems that arise, will be reported  
14 344 within 48 hours to the Human Investigation Committee. A full report will be provided annually or upon  
15 345 request to the IRB and the sponsor's Program Official. The effect of adverse events on the risk/benefit  
16 346 ratio of the study will be re-evaluated by the investigators with each event, with appropriate adjustments  
17 347 made to the protocol or consent forms if needed. Given the minimal risk of the study and intervention, the  
18 348 investigators do not anticipate the occurrence of any serious adverse events.  
19  
20  
21

22 349  
23  
24 350 Results and outcomes of the study will be disseminated through peer-reviewed journals and presentations  
25 351 at relevant scientific meetings throughout the study timeline. A successful pilot trial will aid in a future  
26 352 full randomized control trial to fully measure the effectiveness of the ED-TREAT CDS tool in agitation  
27 353 management in emergency department settings. At the time of publication of any manuscripts that arise  
28 354 from this research, the de-identified data for that manuscript will be made available to share for scholarly  
29 355 activities. Sharing of the data will require a Data Use Agreement to be established between the requesting  
30 356 and host institutions. Data will be shared through secure file transfer.  
31  
32  
33  
34  
35

## 36 357 37 358 **AUTHOR CONTRIBUTIONS** 38

39 359  
40  
41 360 AHW, JDD, KAY, SLB, and ERM designed the study protocol and obtained funding. AHW is  
42 361 responsible for the overall logistical and scientific aspects of the study, data collection and analysis, and  
43 362 draft of this manuscript. DS, AK, MB, PO, and IF provided administrative and logistical support for the  
44 363 study. BN, RK, KA, MB, RAT, and TM contributed statistical, scientific, and design expertise in the  
45 364 development and planned scientific activities of the protocol. All authors contributed to critical revisions  
46 365 and gave final approval of the manuscript.  
47  
48  
49  
50  
51  
52  
53  
54  
55  
56  
57  
58  
59  
60



## FUNDING

This study was supported by the National Institute of Mental Health Award Number K23 MH126366.

The funder had no role in the design and conduct of the study; collection, management, analysis, and interpretation of the data; preparation, review, or approval of the manuscript; and decision to submit the manuscript for publication.

## COMPETING INTERESTS

Dr Wong reported receiving grants from National Institute of Health outside the conduct of the study. Dr. Melnick reported receiving grants and contracts from the National Institute of Health, Agency for Healthcare Research and Quality, American Medical Association, and Centers for Medicare & Medicaid Services outside of this study. Dr. McCall reported receiving grants from the National Institute of Health, Agency for Healthcare Research and Quality, and Google outside of this study. Dr. McCall is a member of the Clinical Diversity Advisory Board at Woebot Health and Advisory Board at RACE Space Inc. Dr. Heckmann reported receiving salary support from the Centers for Medicare & Medicaid Services to develop, implement, and maintain clinical performance outcome measures that are publicly reported, in addition to receiving research support from the U.S. Food and Drug Administration, Centers for Disease Control and Prevention, National Institute of Health, Connecticut Department of Public Health, and from the Community Health Network of Connecticut for her work as a medical consultant.

## Figure Legends

Figure 1. Overview and steps for each phase of ED-TREAT design and pilot implementation study.

Figure 2. Overview and steps for Aim 1: ED-TREAT user-centered design and prototype development.

Figure 3. Anticipated clinical steps for the intervention arm of ED-TREAT.

## References

1. Theriault KM, Rosenheck RA, Rhee TG. Increasing Emergency Department Visits for Mental Health Conditions in the United States. *The Journal of Clinical Psychiatry* 2020;81(5). DOI: 10.4088/JCP.20m13241.
2. Santillanes G, Axeen S, Lam CN, Menchine M. National trends in mental health-related emergency department visits by children and adults, 2009–2015. *The American Journal of Emergency Medicine* 2020;38(12):2536-2544. DOI: 10.1016/j.ajem.2019.12.035.
3. Capp R, Hardy R, Lindrooth R, Wiler J. National Trends in Emergency Department Visits by Adults With Mental Health Disorders. *The Journal of Emergency Medicine* 2016;51(2):131-135.e1. DOI: 10.1016/j.jemermed.2016.05.002.
4. Nordstrom K, Zun LS, Wilson MP, et al. Medical evaluation and triage of the agitated patient: consensus statement of the american association for emergency psychiatry project Beta medical evaluation workgroup. *West J Emerg Med* 2012;13(1):3-10. DOI: 10.5811/westjem.2011.9.6863.
5. Holloman GH, Jr., Zeller SL. Overview of Project BETA: Best practices in Evaluation and Treatment of Agitation. *West J Emerg Med* 2012;13(1):1-2. DOI: 10.5811/westjem.2011.9.6865.
6. Zeller SL, Rhoades RW. Systematic reviews of assessment measures and pharmacologic treatments for agitation. *Clin Ther* 2010;32(3):403-25. DOI: 10.1016/j.clinthera.2010.03.006.
7. Wong AH, Ray JM, Eixenberger C, et al. Qualitative study of patient experiences and care observations during agitation events in the emergency department: implications for systems-based practice. *BMJ Open* 2022;12(5):e059876. DOI: 10.1136/bmjopen-2021-059876.
8. Hooton A, Bloom BM, Backus B. Violence against healthcare workers at the Emergency Department. *Eur J Emerg Med* 2022;29(2):89-90. DOI: 10.1097/mej.0000000000000905.
9. Gates DM, Ross CS, McQueen L. Violence against emergency department workers. *J Emerg Med* 2006;31(3):331-7. DOI: 10.1016/j.jemermed.2005.12.028.
10. Wong AH, Whitfill T, Ohuabunwa EC, et al. Association of Race/Ethnicity and Other Demographic Characteristics With Use of Physical Restraints in the Emergency Department. *JAMA Netw Open* 2021;4(1):e2035241. DOI: 10.1001/jamanetworkopen.2020.35241.
11. Wong AH, Taylor RA, Ray JM, Bernstein SL. Physical Restraint Use in Adult Patients Presenting to a General Emergency Department. *Ann Emerg Med* 2019;73(2):183-192. DOI: 10.1016/j.annemergmed.2018.06.020.
12. Grant JR, Southall PE, Fowler DR, Mealey J, Thomas EJ, Kinlock TW. Death in custody: a historical analysis. *J Forensic Sci* 2007;52(5):1177-81. DOI: 10.1111/j.1556-4029.2007.00500.x.
13. Barnett R, Stirling C, Pandyan AD. A review of the scientific literature related to the adverse impact of physical restraint: gaining a clearer understanding of the physiological factors involved in cases of restraint-related death. *Med Sci Law* 2012;52(3):137-42. DOI: 10.1258/msl.2011.011101.
14. Zun LS. A prospective study of the complication rate of use of patient restraint in the emergency department. *J Emerg Med* 2003;24(2):119-24. (<https://www.ncbi.nlm.nih.gov/pubmed/12609639>).
15. Korczak V, Kirby A, Gunja N. Chemical agents for the sedation of agitated patients in the ED: a systematic review. *Am J Emerg Med* 2016;34(12):2426-2431. DOI: 10.1016/j.ajem.2016.09.025.
16. Mohr WK, Petti TA, Mohr BD. Adverse effects associated with physical restraint. *Can J Psychiatry* 2003;48(5):330-7. DOI: 10.1177/070674370304800509.
17. Karger B, Fracasso T, Pfeiffer H. Fatalities related to medical restraint devices-asphyxia is a common finding. *Forensic Sci Int* 2008;178(2-3):178-84. DOI: 10.1016/j.forsciint.2008.03.016.
18. Wilson MP, Pepper D, Currier GW, Holloman GH, Jr., Feifel D. The psychopharmacology of agitation: consensus statement of the american association for emergency psychiatry project Beta psychopharmacology workgroup. *West J Emerg Med* 2012;13(1):26-34. DOI: 10.5811/westjem.2011.9.6866.

19. Richmond JS, Berlin JS, Fishkind AB, et al. Verbal De-escalation of the Agitated Patient: Consensus Statement of the American Association for Emergency Psychiatry Project BETA De-escalation Workgroup. *West J Emerg Med* 2012;13(1):17-25. DOI: 10.5811/westjem.2011.9.6864.
20. Knox DK, Holloman GH, Jr. Use and avoidance of seclusion and restraint: consensus statement of the american association for emergency psychiatry project Beta seclusion and restraint workgroup. *West J Emerg Med* 2012;13(1):35-40. DOI: 10.5811/westjem.2011.9.6867.
21. Chan EW, Taylor DM, Knott JC, Kong DC. Variation in the management of hypothetical cases of acute agitation in Australasian emergency departments. *Emerg Med Australas* 2011;23(1):23-32. DOI: 10.1111/j.1742-6723.2010.01348.x.
22. Downey LV, Zun LS, Gonzales SJ. Frequency of alternative to restraints and seclusion and uses of agitation reduction techniques in the emergency department. *Gen Hosp Psychiatry* 2007;29(6):470-4. DOI: 10.1016/j.genhosppsych.2007.07.006.
23. Richardson SK, Ardagh MW, Morrison R, Grainger PC. Management of the aggressive emergency department patient: non-pharmacological perspectives and evidence base. *Open Access Emerg Med* 2019;11:271-290. DOI: 10.2147/OAEM.S192884.
24. Kovacs G, Croskerry P. Clinical decision making: an emergency medicine perspective. *Acad Emerg Med* 1999;6(9):947-52. DOI: 10.1111/j.1553-2712.1999.tb01246.x.
25. Hooker EA, Mallow PJ, Oglesby MM. Characteristics and Trends of Emergency Department Visits in the United States (2010-2014). *J Emerg Med* 2019;56(3):344-351. DOI: 10.1016/j.jemermed.2018.12.025.
26. Lane BH, Mallow PJ, Hooker MB, Hooker E. Trends in United States emergency department visits and associated charges from 2010 to 2016. *Am J Emerg Med* 2020;38(8):1576-1581. DOI: 10.1016/j.ajem.2019.158423.
27. Peterson SM, Harbertson CA, Scheulen JJ, Kelen GD. Trends and Characterization of Academic Emergency Department Patient Visits: A Five-year Review. *Acad Emerg Med* 2019;26(4):410-419. DOI: 10.1111/acem.13550.
28. Skinner HG, Blanchard J, Elixhauser A. Trends in Emergency Department Visits, 2006-2011. Healthcare Cost and Utilization Project (HCUP) Statistical Briefs. Rockville (MD)2006.
29. Chang G, Weiss AP, Orav EJ, et al. Bottlenecks in the emergency department: the psychiatric clinicians' perspective. *Gen Hosp Psychiatry* 2012;34(4):403-9. DOI: 10.1016/j.genhosppsych.2012.03.005.
30. Nordstrom K, Berlin JS, Nash SS, Shah SB, Schmelzer NA, Worley LLM. Boarding of Mentally Ill Patients in Emergency Departments: American Psychiatric Association Resource Document. *West J Emerg Med* 2019;20(5):690-695. DOI: 10.5811/westjem.2019.6.42422.
31. Richmond JS, Dragatsi D, Stiebel V, Rozel JS, Rasimas JJ. American Association for Emergency Psychiatry Recommendations to Address Psychiatric Staff Shortages in Emergency Settings. *Psychiatr Serv* 2021;72(4):437-443. DOI: 10.1176/appi.ps.201900501.
32. Zun LS. An issue of equity of care: psychiatric patients must be treated "on par" with medical patients. *Am J Psychiatry* 2014;171(7):716-9. DOI: 10.1176/appi.ajp.2014.14010002.
33. Wong AH, Combellick J, Wispelwey BA, Squires A, Gang M. The Patient Care Paradox: An Interprofessional Qualitative Study of Agitated Patient Care in the Emergency Department. *Acad Emerg Med* 2017;24(2):226-235. DOI: 10.1111/acem.13117.
34. Wong AH, Crispino L, Parker J, et al. Use of sedatives and restraints for treatment of agitation in the emergency department. *Am J Emerg Med* 2019;37(7):1376-1379. DOI: 10.1016/j.ajem.2018.12.027.
35. Wong AH, Crispino L, Parker JB, et al. Characteristics and Severity of Agitation Associated With Use of Sedatives and Restraints in the Emergency Department. *J Emerg Med* 2019;57(5):611-619. DOI: 10.1016/j.jemermed.2019.07.019.

- 1 36. Miller A, Koola JD, Matheny ME, et al. Application of contextual design methods to inform  
2 targeted clinical decision support interventions in sub-specialty care environments. *Int J Med*  
3 *Inform* 2018;117:55-65. DOI: 10.1016/j.ijmedinf.2018.05.005.
- 4 37. Maguire M. Methods to support human-centred design. *International Journal of Human-Computer*  
5 *Studies* 2001;55(4):587-634. DOI: <https://doi.org/10.1006/ijhc.2001.0503>.
- 6 38. Kwan JL, Lo L, Ferguson J, et al. Computerised clinical decision support systems and absolute  
7 improvements in care: meta-analysis of controlled clinical trials. *BMJ* 2020;370:m3216. DOI:  
8 10.1136/bmj.m3216.
- 9 39. Bright TJ, Wong A, Dhurjati R, et al. Effect of clinical decision-support systems: a systematic  
10 review. *Ann Intern Med* 2012;157(1):29-43. DOI: 10.7326/0003-4819-157-1-201207030-00450.
- 11 40. Kawamoto K, Houlihan CA, Balas EA, Lobach DF. Improving clinical practice using clinical  
12 decision support systems: a systematic review of trials to identify features critical to success. *BMJ*  
13 2005;330(7494):765. DOI: 10.1136/bmj.38398.500764.8F.
- 14 41. Garg AX, Adhikari NK, McDonald H, et al. Effects of computerized clinical decision support  
15 systems on practitioner performance and patient outcomes: a systematic review. *JAMA*  
16 2005;293(10):1223-38. DOI: 10.1001/jama.293.10.1223.
- 17 42. Phillips JP. Workplace Violence against Health Care Workers in the United States. *N Engl J Med*  
18 2016;375(7):e14. DOI: 10.1056/NEJMc1606816.
- 19 43. Musen MA, Middleton B, Greenes RA. Clinical Decision-Support Systems. In: Shortliffe EH,  
20 Cimino JJ, eds. *Biomedical Informatics: Computer Applications in Health Care and Biomedicine*.  
21 London: Springer London; 2014:643-674.
- 22 44. Dean NC, Jones BE, Jones JP, et al. Impact of an Electronic Clinical Decision Support Tool for  
23 Emergency Department Patients With Pneumonia. *Ann Emerg Med* 2015;66(5):511-20. DOI:  
24 10.1016/j.annemergmed.2015.02.003.
- 25 45. Li AC, Kannry JL, Kushniruk A, et al. Integrating usability testing and think-aloud protocol  
26 analysis with "near-live" clinical simulations in evaluating clinical decision support. *Int J Med*  
27 *Inform* 2012;81(11):761-72. DOI: 10.1016/j.ijmedinf.2012.02.009.
- 28 46. Roppolo LP, Morris DW, Khan F, et al. Improving the management of acutely agitated patients in  
29 the emergency department through implementation of Project BETA (Best Practices in the  
30 Evaluation and Treatment of Agitation). *J Am Coll Emerg Physicians Open* 2020;1(5):898-907.  
31 DOI: 10.1002/emp2.12138.
- 32 47. Wong AH, Auerbach MA, Ruppel H, et al. Addressing Dual Patient and Staff Safety Through A  
33 Team-Based Standardized Patient Simulation for Agitation Management in the Emergency  
34 Department. *Simul Healthc* 2018;13(3):154-162. DOI: 10.1097/SIH.0000000000000309.
- 35 48. Wong AH, Ruppel H, Crispino LJ, Rosenberg A, Iennaco JD, Vaca FE. Deriving a Framework for  
36 a Systems Approach to Agitated Patient Care in the Emergency Department. *Jt Comm J Qual*  
37 *Patient Saf* 2018;44(5):279-292. DOI: 10.1016/j.jcjq.2017.11.011.
- 38 49. Agboola IK, Coupet E, Jr., Wong AH. "The Coats That We Can Take Off and the Ones We  
39 Can't": The Role of Trauma-Informed Care on Race and Bias During Agitation in the Emergency  
40 Department. *Ann Emerg Med* 2021;77(5):493-498. DOI: 10.1016/j.annemergmed.2020.11.021.
- 41 50. Jin RO, Anaebere TC, Haar RJ. Exploring bias in restraint use: Four strategies to mitigate bias in  
42 care of the agitated patient in the emergency department. *Acad Emerg Med* 2021;28(9):1061-  
43 1066. DOI: 10.1111/acem.14277.
- 44 51. Hahn S, Muller M, Hantikainen V, Kok G, Dassen T, Halfens RJ. Risk factors associated with  
45 patient and visitor violence in general hospitals: results of a multiple regression analysis. *Int J*  
46 *Nurs Stud* 2013;50(3):374-85. DOI: 10.1016/j.ijnurstu.2012.09.018.
- 47 52. Wong AH, Ray JM, Rosenberg A, et al. Experiences of Individuals Who Were Physically  
48 Restrained in the Emergency Department. *JAMA Netw Open* 2020;3(1):e1919381. DOI:  
49 10.1001/jamanetworkopen.2019.19381.
- 50
- 51
- 52
- 53
- 54
- 55
- 56
- 57
- 58
- 59
- 60

53. Epstein RH, Hofer IS, Salari V, Gabel E. Successful Implementation of a Perioperative Data Warehouse Using Another Hospital's Published Specification From Epic's Electronic Health Record System. *Anesth Analg* 2021;132(2):465-474. DOI: 10.1213/ane.0000000000004806.
54. Melnick ER, Holland WC, Ahmed OM, et al. An integrated web application for decision support and automation of EHR workflow: a case study of current challenges to standards-based messaging and scalability from the EMBED trial. *JAMIA Open* 2019;2(4):434-439. DOI: 10.1093/jamiaopen/ooz053.
55. Stowell KR, Florence P, Harman HJ, Glick RL. Psychiatric evaluation of the agitated patient: consensus statement of the american association for emergency psychiatry project Beta psychiatric evaluation workgroup. *West J Emerg Med* 2012;13(1):11-6. DOI: 10.5811/westjem.2011.9.6868.
56. Swift RH, Harrigan EP, Cappelleri JC, Kramer D, Chandler LP. Validation of the behavioural activity rating scale (BARS): a novel measure of activity in agitated patients. *J Psychiatr Res* 2002;36(2):87-95. DOI: 10.1016/s0022-3956(01)00052-8.
57. Cho H, Keenan G, Madandola OO, et al. Assessing the Usability of a Clinical Decision Support System: Heuristic Evaluation. *JMIR Hum Factors* 2022;9(2):e31758. DOI: 10.2196/31758.
58. Pope C, Ziebland S, Mays N. Qualitative research in health care. *Analysing qualitative data*. *BMJ* 2000;320(7227):114-6. DOI: 10.1136/bmj.320.7227.114.
59. Bangor A, Kortum PT, Miller JT. An Empirical Evaluation of the System Usability Scale. *International Journal of Human-Computer Interaction* 2008;24:574 - 594.
60. Lewis JR. The System Usability Scale: Past, Present, and Future. *International Journal of Human-Computer Interaction* 2018;34(7):577-590. DOI: 10.1080/10447318.2018.1455307.
61. Lucero A. Using Affinity Diagrams to Evaluate Interactive Prototypes. *Human-Computer Interaction – INTERACT 2015*: Springer-Verlag; 2022:231–248.
62. Beyer H, Holtzblatt K. *Contextual Design: Defining Customer-Centered Systems*: Morgan Kaufmann Publishers Inc., 1997.
63. Ho J, Aridor O, Parwani AV. Use of contextual inquiry to understand anatomic pathology workflow: Implications for digital pathology adoption. *J Pathol Inform* 2012;3:35. DOI: 10.4103/2153-3539.101794.
64. van den Driesche C, Kerklaan S. The value of visual co-analysis models for an inclusive citizen science approach. Inspired by co-creation methods from design thinking. *fteval JOURNAL for Research and Technology Policy Evaluation* 2022(54):51-60. DOI: 10.22163/fteval.2022.571.
65. Hsieh HF, Shannon SE. Three approaches to qualitative content analysis. *Qual Health Res* 2005;15(9):1277-88. DOI: 10.1177/1049732305276687.
66. Holden RJ, Carayon P, Gurses AP, et al. SEIPS 2.0: a human factors framework for studying and improving the work of healthcare professionals and patients. *Ergonomics* 2013;56(11):1669-86. DOI: 10.1080/00140139.2013.838643.
67. Talanquer V. *Using Qualitative Analysis Software To Facilitate Qualitative Data Analysis*. *Tools of Chemistry Education Research*: American Chemical Society; 2014:83-95.
68. Jenssen BP, Bryant-Stephens T, Leone FT, Grundmeier RW, Fiks AG. Clinical Decision Support Tool for Parental Tobacco Treatment in Primary Care. *Pediatrics* 2016;137(5). DOI: 10.1542/peds.2015-4185.
69. Collingridge DS, Gantt EE. The quality of qualitative research. *Am J Med Qual* 2008;23(5):389-95. DOI: 10.1177/1062860608320646.
70. Curry LA, Nembhard IM, Bradley EH. Qualitative and mixed methods provide unique contributions to outcomes research. *Circulation* 2009;119(10):1442-52. DOI: 10.1161/circulationaha.107.742775.
71. Ranney ML, Meisel ZF, Choo EK, Garro AC, Sasson C, Morrow Guthrie K. Interview-based Qualitative Research in Emergency Care Part II: Data Collection, Analysis and Results Reporting. *Acad Emerg Med* 2015;22(9):1103-12. DOI: 10.1111/acem.12735.

- 1  
2  
3  
4  
5  
6  
7  
8  
9  
10  
11  
12  
13  
14  
15  
16  
17  
18  
19  
20  
21  
22  
23  
24  
25  
26  
27  
28  
29  
30  
31  
32  
33  
34  
35  
36  
37  
38  
39  
40  
41  
42  
43  
44  
45  
46  
47  
48  
49  
50  
51  
52  
53  
54  
55  
56  
57  
58  
59  
60
72. Guest G, Namey E, McKenna K. How Many Focus Groups Are Enough? Building an Evidence Base for Nonprobability Sample Sizes. *Field Methods* 2016;29. DOI: 10.1177/1525822x16639015.
73. Kushniruk AW, Patel VL. Cognitive and usability engineering methods for the evaluation of clinical information systems. *J Biomed Inform* 2004;37(1):56-76. DOI: 10.1016/j.jbi.2004.01.003.
74. Ray JM, Ahmed OM, Solad Y, et al. Computerized Clinical Decision Support System for Emergency Department-Initiated Buprenorphine for Opioid Use Disorder: User-Centered Design. *JMIR Hum Factors* 2019;6(1):e13121. DOI: 10.2196/13121.
75. Lancaster GA, Dodd S, Williamson PR. Design and analysis of pilot studies: recommendations for good practice. *J Eval Clin Pract* 2004;10(2):307-12. DOI: 10.1111/j.2002.384.doc.x.
76. Thabane L, Ma J, Chu R, et al. A tutorial on pilot studies: the what, why and how. *BMC Med Res Methodol* 2010;10:1. DOI: 10.1186/1471-2288-10-1.
77. Weiss SJ, Ernst AA, Nick TG. Comparison of the National Emergency Department Overcrowding Scale and the Emergency Department Work Index for quantifying emergency department crowding. *Acad Emerg Med* 2006;13(5):513-8. DOI: 10.1197/j.aem.2005.12.009.

Figure 1. Overview and steps for the phase of ED-TREAT design and pilot implementation study.

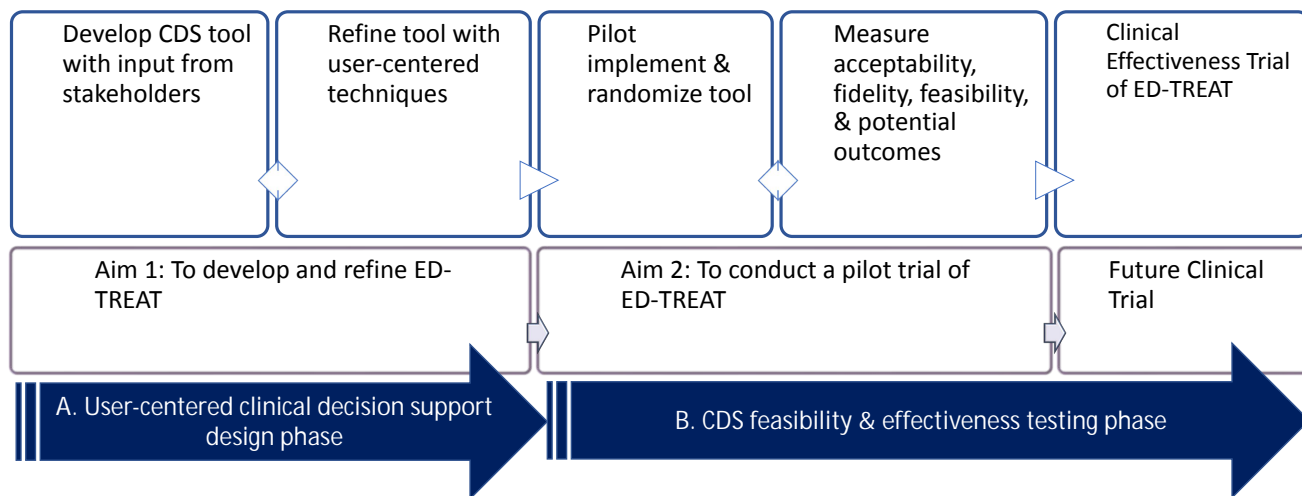

EW Only

Figure 2. Overview and steps for Aim 1: ED-TREAT user-centered design and prototype development.

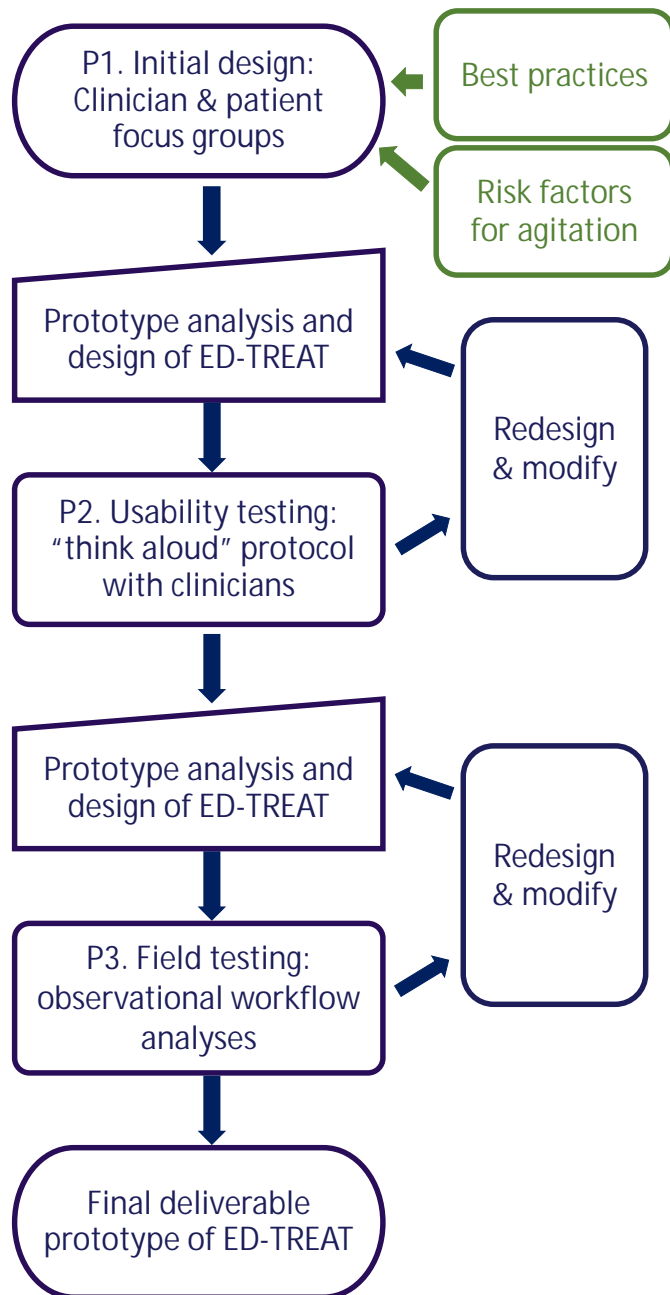



Figure 3. Anticipated clinical steps for the intervention arm of ED-TREAT.

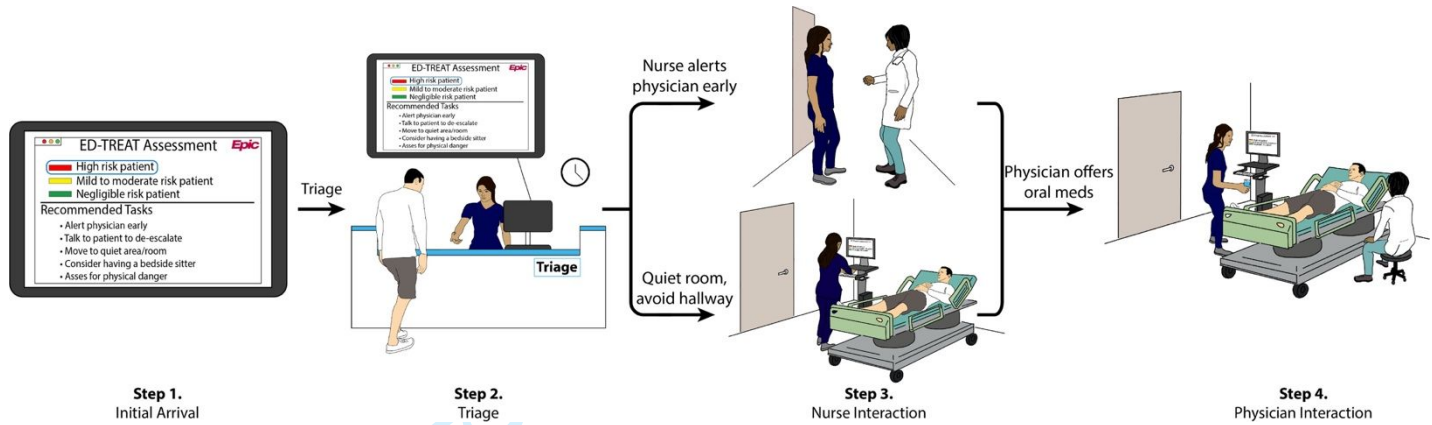

Supplemental Table 1: Sample focus group topics for design and development of ED-TREAT (P1)

| Design Domain <sup>51</sup> | Example factors and sample question prompts                                                                                                                                                                                                                                                                                                                    |
|-----------------------------|----------------------------------------------------------------------------------------------------------------------------------------------------------------------------------------------------------------------------------------------------------------------------------------------------------------------------------------------------------------|
| User groups                 | <ul style="list-style-type: none"> <li>• Timing, benefits &amp; obstacles to using CDS for managing at-risk patients</li> <li>• Attitudes, beliefs, &amp; knowledge regarding treatment of at-risk patients</li> <li>• Potential impact of ED-TREAT on patient experience and needs during visit</li> </ul>                                                    |
| Tasks and technology        | <ul style="list-style-type: none"> <li>• Potential formats and interfaces for ED-TREAT prototype</li> <li>• Types of data and information to be included in ED-TREAT</li> <li>• Clinician interface with EHR and clinical duties related to ED-TREAT recommendations</li> </ul>                                                                                |
| System and organization     | <ul style="list-style-type: none"> <li>• Potential effect of ED-TREAT on management of at-risk patients</li> <li>• Workflow and care coordination amongst team members that can impact ED-TREAT across user types</li> <li>• Facilitators &amp; barriers to implementing best practices for preventing agitation in real-world clinical environment</li> </ul> |

Supplemental Table 2: Potential risk factors that predict development of agitation in the ED

| Domain          | Data elements                                                                                                                                                                                                                                                                                                                                                                                                                             |
|-----------------|-------------------------------------------------------------------------------------------------------------------------------------------------------------------------------------------------------------------------------------------------------------------------------------------------------------------------------------------------------------------------------------------------------------------------------------------|
| Patient factors | <ul style="list-style-type: none"> <li>• Violence history: presence of violence alert, Brøset Violence Checklist (BVC)<sup>54</sup></li> <li>• History: chief complaint, psychiatric/medical history, alcohol/substance use, # ED visits/year, medications</li> </ul>                                                                                                                                                                     |
| Clinical data   | <ul style="list-style-type: none"> <li>• Laboratory data: complete blood count, urine toxicology, point-of-care glucose &amp; alcohol, basic metabolic panel</li> <li>• Initial vital signs: heart rate, temperature, systolic/diastolic blood pressures, oxygen saturation, respiratory rate</li> <li>• Restraint characteristics: type/route/dose of chemical sedative(s) used, reasons for &amp; type of physical restraint</li> </ul> |
| Environment     | <ul style="list-style-type: none"> <li>• Physical parameters: initial bed location assignment, hallway spot, time of day of presentation</li> <li>• Staff contact: initial staff contact, staff characteristics &amp; interactions, presence of security officers at arrival into ED</li> </ul>                                                                                                                                           |
| System          | <ul style="list-style-type: none"> <li>• Pre-arrival: mode of transport into ED, presence of law enforcement escort</li> <li>• Outpatient services: mental health visits, assertive community treatment, rehabilitation services</li> </ul>                                                                                                                                                                                               |

Supplemental Table 3: Sample usability testing topics and observational tasks (field testing)

| Usability testing goals and objectives (P2)                                                                                                                                                                                                                                                                                                                                                                                                                                                                                                                                                                                           | Field testing observation task examples (P3)                                                                                                                                                                                                                                                                                                                                                                                                                                                                                   |
|---------------------------------------------------------------------------------------------------------------------------------------------------------------------------------------------------------------------------------------------------------------------------------------------------------------------------------------------------------------------------------------------------------------------------------------------------------------------------------------------------------------------------------------------------------------------------------------------------------------------------------------|--------------------------------------------------------------------------------------------------------------------------------------------------------------------------------------------------------------------------------------------------------------------------------------------------------------------------------------------------------------------------------------------------------------------------------------------------------------------------------------------------------------------------------|
| <ul style="list-style-type: none"> <li>• Effectiveness: Ability of users to achieve task goals</li> <li>• Efficiency: Time/speed to complete tasks within tool</li> <li>• Satisfaction: Ease of use &amp; acceptability of ED-TREAT</li> <li>• Understandability: Users comprehending what ED-TREAT can do</li> <li>• Learnability: Training/time/effort to learn how to use ED-TREAT</li> <li>• Operability: Support of user and overcoming potential problems</li> <li>• Flexibility: Ability to accommodate for different situations/needs</li> <li>• Attractiveness: Motivation of user interest to explore/use system</li> </ul> | <ul style="list-style-type: none"> <li>• Triage assessment and room assignment</li> <li>• Initial contact at bedside and assessment</li> <li>• Potential structural biases and differential treatment plans</li> <li>• History and physical exam, monitoring and re-assessment</li> <li>• De-escalation and establishing rapport</li> <li>• Ordering of medications, laboratory &amp; imaging tests</li> <li>• Patient behaviors, responses, experiences</li> <li>• EHR documentation &amp; interface with ED-TREAT</li> </ul> |

SPIRIT 2013 Checklist: Recommended items to address in a clinical trial protocol and related documents\*

| Section/item                      | Item No | Description                                                                                                                                                                                                                                                                              | Addressed on page number |
|-----------------------------------|---------|------------------------------------------------------------------------------------------------------------------------------------------------------------------------------------------------------------------------------------------------------------------------------------------|--------------------------|
| <b>Administrative information</b> |         |                                                                                                                                                                                                                                                                                          |                          |
| Title                             | 1       | Descriptive title identifying the study design, population, interventions, and, if applicable, trial acronym                                                                                                                                                                             | 1                        |
| Trial registration                | 2a      | Trial identifier and registry name. If not yet registered, name of intended registry                                                                                                                                                                                                     | 2                        |
|                                   | 2b      | All items from the World Health Organization Trial Registration Data Set                                                                                                                                                                                                                 | N/A                      |
| Protocol version                  | 3       | Date and version identifier                                                                                                                                                                                                                                                              | N/A                      |
| Funding                           | 4       | Sources and types of financial, material, and other support                                                                                                                                                                                                                              | 15-16                    |
| Roles and responsibilities        | 5a      | Names, affiliations, and roles of protocol contributors                                                                                                                                                                                                                                  | 1, 16                    |
|                                   | 5b      | Name and contact information for the trial sponsor                                                                                                                                                                                                                                       | 15                       |
|                                   | 5c      | Role of study sponsor and funders, if any, in study design; collection, management, analysis, and interpretation of data; writing of the report; and the decision to submit the report for publication, including whether they will have ultimate authority over any of these activities | 15-16                    |
|                                   | 5d      | Composition, roles, and responsibilities of the coordinating centre, steering committee, endpoint adjudication committee, data management team, and other individuals or groups overseeing the trial, if applicable (see Item 21a for data monitoring committee)                         | 15-16                    |

1 **Introduction**

2

3 Background and rationale 6a Description of research question and justification for undertaking the trial, including summary of relevant studies (published and unpublished) examining benefits and harms for each intervention 3-4

4

5

6 6b Explanation for choice of comparators 4

7

8 Objectives 7 Specific objectives or hypotheses 4

9

10 Trial design 8 Description of trial design including type of trial (eg, parallel group, crossover, factorial, single group), allocation ratio, and framework (eg, superiority, equivalence, noninferiority, exploratory) 2, 9, 14

11

12

13

14 **Methods: Participants, interventions, and outcomes**

15

16 Study setting 9 Description of study settings (eg, community clinic, academic hospital) and list of countries where data will be collected. Reference to where list of study sites can be obtained 4-5, 9

17

18

19 Eligibility criteria 10 Inclusion and exclusion criteria for participants. If applicable, eligibility criteria for study centres and individuals who will perform the interventions (eg, surgeons, psychotherapists) 9, 12

20

21

22 Interventions 11a Interventions for each group with sufficient detail to allow replication, including how and when they will be administered 10, 12

23

24

25 11b Criteria for discontinuing or modifying allocated interventions for a given trial participant (eg, drug dose change in response to harms, participant request, or improving/worsening disease) N/A

26

27

28 11c Strategies to improve adherence to intervention protocols, and any procedures for monitoring adherence (eg, drug tablet return, laboratory tests) N/A

29

30

31 11d Relevant concomitant care and interventions that are permitted or prohibited during the trial N/A

32

33

34 Outcomes 12 Primary, secondary, and other outcomes, including the specific measurement variable (eg, systolic blood pressure), analysis metric (eg, change from baseline, final value, time to event), method of aggregation (eg, median, proportion), and time point for each outcome. Explanation of the clinical relevance of chosen efficacy and harm outcomes is strongly recommended 12-13

35

36

37

38

39

40

41

42

43

44

45

46

|   |                      |    |                                                                                                                                                                                       |        |
|---|----------------------|----|---------------------------------------------------------------------------------------------------------------------------------------------------------------------------------------|--------|
| 1 | Participant timeline | 13 | Time schedule of enrolment, interventions (including any run-ins and washouts), assessments, and visits for participants. A schematic diagram is highly recommended (see Figure)      | 12-14  |
| 2 |                      |    |                                                                                                                                                                                       |        |
| 3 |                      |    |                                                                                                                                                                                       |        |
| 4 | Sample size          | 14 | Estimated number of participants needed to achieve study objectives and how it was determined, including clinical and statistical assumptions supporting any sample size calculations | 12-14  |
| 5 |                      |    |                                                                                                                                                                                       |        |
| 6 |                      |    |                                                                                                                                                                                       |        |
| 7 | Recruitment          | 15 | Strategies for achieving adequate participant enrolment to reach target sample size                                                                                                   | 12, 14 |
| 8 |                      |    |                                                                                                                                                                                       |        |
| 9 |                      |    |                                                                                                                                                                                       |        |

10 **Methods: Assignment of interventions (for controlled trials)**

11 Allocation:

|    |                                  |     |                                                                                                                                                                                                                                                                                                                                                          |     |
|----|----------------------------------|-----|----------------------------------------------------------------------------------------------------------------------------------------------------------------------------------------------------------------------------------------------------------------------------------------------------------------------------------------------------------|-----|
| 12 |                                  |     |                                                                                                                                                                                                                                                                                                                                                          |     |
| 13 |                                  |     |                                                                                                                                                                                                                                                                                                                                                          |     |
| 14 | Sequence generation              | 16a | Method of generating the allocation sequence (eg, computer-generated random numbers), and list of any factors for stratification. To reduce predictability of a random sequence, details of any planned restriction (eg, blocking) should be provided in a separate document that is unavailable to those who enrol participants or assign interventions | 12  |
| 15 |                                  |     |                                                                                                                                                                                                                                                                                                                                                          |     |
| 16 |                                  |     |                                                                                                                                                                                                                                                                                                                                                          |     |
| 17 |                                  |     |                                                                                                                                                                                                                                                                                                                                                          |     |
| 18 |                                  |     |                                                                                                                                                                                                                                                                                                                                                          |     |
| 19 | Allocation concealment mechanism | 16b | Mechanism of implementing the allocation sequence (eg, central telephone; sequentially numbered, opaque, sealed envelopes), describing any steps to conceal the sequence until interventions are assigned                                                                                                                                                | 12  |
| 20 |                                  |     |                                                                                                                                                                                                                                                                                                                                                          |     |
| 21 |                                  |     |                                                                                                                                                                                                                                                                                                                                                          |     |
| 22 |                                  |     |                                                                                                                                                                                                                                                                                                                                                          |     |
| 23 |                                  |     |                                                                                                                                                                                                                                                                                                                                                          |     |
| 24 | Implementation                   | 16c | Who will generate the allocation sequence, who will enrol participants, and who will assign participants to interventions                                                                                                                                                                                                                                | 12  |
| 25 |                                  |     |                                                                                                                                                                                                                                                                                                                                                          |     |
| 26 |                                  |     |                                                                                                                                                                                                                                                                                                                                                          |     |
| 27 | Blinding (masking)               | 17a | Who will be blinded after assignment to interventions (eg, trial participants, care providers, outcome assessors, data analysts), and how                                                                                                                                                                                                                | N/A |
| 28 |                                  |     |                                                                                                                                                                                                                                                                                                                                                          |     |
| 29 |                                  |     |                                                                                                                                                                                                                                                                                                                                                          |     |
| 30 |                                  | 17b | If blinded, circumstances under which unblinding is permissible, and procedure for revealing a participant's allocated intervention during the trial                                                                                                                                                                                                     | N/A |
| 31 |                                  |     |                                                                                                                                                                                                                                                                                                                                                          |     |
| 32 |                                  |     |                                                                                                                                                                                                                                                                                                                                                          |     |
| 33 |                                  |     |                                                                                                                                                                                                                                                                                                                                                          |     |

34 **Methods: Data collection, management, and analysis**

|    |                         |     |                                                                                                                                                                                                                                                                                                                                                                                                              |      |
|----|-------------------------|-----|--------------------------------------------------------------------------------------------------------------------------------------------------------------------------------------------------------------------------------------------------------------------------------------------------------------------------------------------------------------------------------------------------------------|------|
| 35 |                         |     |                                                                                                                                                                                                                                                                                                                                                                                                              |      |
| 36 | Data collection methods | 18a | Plans for assessment and collection of outcome, baseline, and other trial data, including any related processes to promote data quality (eg, duplicate measurements, training of assessors) and a description of study instruments (eg, questionnaires, laboratory tests) along with their reliability and validity, if known. Reference to where data collection forms can be found, if not in the protocol | 4-14 |
| 37 |                         |     |                                                                                                                                                                                                                                                                                                                                                                                                              |      |
| 38 |                         |     |                                                                                                                                                                                                                                                                                                                                                                                                              |      |
| 39 |                         |     |                                                                                                                                                                                                                                                                                                                                                                                                              |      |
| 40 |                         |     |                                                                                                                                                                                                                                                                                                                                                                                                              |      |
| 41 |                         |     |                                                                                                                                                                                                                                                                                                                                                                                                              |      |
| 42 |                         |     |                                                                                                                                                                                                                                                                                                                                                                                                              |      |

|    |                                 |     |                                                                                                              |           |
|----|---------------------------------|-----|--------------------------------------------------------------------------------------------------------------|-----------|
| 1  |                                 | 18b | Plans to promote participant retention and complete follow-up, including list of any outcome data to be      | 12-14     |
| 2  |                                 |     | collected for participants who discontinue or deviate from intervention protocols                            |           |
| 3  |                                 |     |                                                                                                              |           |
| 4  | Data management                 | 19  | Plans for data entry, coding, security, and storage, including any related processes to promote data quality | 8-10      |
| 5  |                                 |     | (eg, double data entry; range checks for data values). Reference to where details of data management         |           |
| 6  |                                 |     | procedures can be found, if not in the protocol                                                              |           |
| 7  |                                 |     |                                                                                                              |           |
| 8  | Statistical methods             | 20a | Statistical methods for analysing primary and secondary outcomes. Reference to where other details of the    | 8, 10, 11 |
| 9  |                                 |     | statistical analysis plan can be found, if not in the protocol                                               |           |
| 10 |                                 |     |                                                                                                              |           |
| 11 |                                 | 20b | Methods for any additional analyses (eg, subgroup and adjusted analyses)                                     | N/A       |
| 12 |                                 |     |                                                                                                              |           |
| 13 |                                 | 20c | Definition of analysis population relating to protocol non-adherence (eg, as randomised analysis), and any   | N/A       |
| 14 |                                 |     | statistical methods to handle missing data (eg, multiple imputation)                                         |           |
| 15 |                                 |     |                                                                                                              |           |
| 16 |                                 |     |                                                                                                              |           |
| 17 |                                 |     |                                                                                                              |           |
| 18 |                                 |     |                                                                                                              |           |
| 19 |                                 |     |                                                                                                              |           |
| 20 |                                 |     |                                                                                                              |           |
| 21 | <b>Methods: Monitoring</b>      |     |                                                                                                              |           |
| 22 |                                 |     |                                                                                                              |           |
| 23 | Data monitoring                 | 21a | Composition of data monitoring committee (DMC); summary of its role and reporting structure; statement of    | 14-15     |
| 24 |                                 |     | whether it is independent from the sponsor and competing interests; and reference to where further details   |           |
| 25 |                                 |     | about its charter can be found, if not in the protocol. Alternatively, an explanation of why a DMC is not    |           |
| 26 |                                 |     | needed                                                                                                       |           |
| 27 |                                 |     |                                                                                                              |           |
| 28 |                                 |     |                                                                                                              |           |
| 29 |                                 | 21b | Description of any interim analyses and stopping guidelines, including who will have access to these interim | N/A       |
| 30 |                                 |     | results and make the final decision to terminate the trial                                                   |           |
| 31 |                                 |     |                                                                                                              |           |
| 32 | Harms                           | 22  | Plans for collecting, assessing, reporting, and managing solicited and spontaneously reported adverse        | 14-15     |
| 33 |                                 |     | events and other unintended effects of trial interventions or trial conduct                                  |           |
| 34 |                                 |     |                                                                                                              |           |
| 35 | Auditing                        | 23  | Frequency and procedures for auditing trial conduct, if any, and whether the process will be independent     | N/A       |
| 36 |                                 |     | from investigators and the sponsor                                                                           |           |
| 37 |                                 |     |                                                                                                              |           |
| 38 |                                 |     |                                                                                                              |           |
| 39 | <b>Ethics and dissemination</b> |     |                                                                                                              |           |
| 40 |                                 |     |                                                                                                              |           |
| 41 |                                 |     |                                                                                                              |           |
| 42 |                                 |     |                                                                                                              |           |
| 43 |                                 |     |                                                                                                              |           |
| 44 |                                 |     |                                                                                                              |           |
| 45 |                                 |     |                                                                                                              |           |
| 46 |                                 |     |                                                                                                              |           |

|    |                               |     |                                                                                                                                                                                                                                                                                     |              |
|----|-------------------------------|-----|-------------------------------------------------------------------------------------------------------------------------------------------------------------------------------------------------------------------------------------------------------------------------------------|--------------|
| 1  | Research ethics approval      | 24  | Plans for seeking research ethics committee/institutional review board (REC/IRB) approval                                                                                                                                                                                           | 14-15        |
| 2  |                               |     |                                                                                                                                                                                                                                                                                     |              |
| 3  |                               |     |                                                                                                                                                                                                                                                                                     |              |
| 4  | Protocol amendments           | 25  | Plans for communicating important protocol modifications (eg, changes to eligibility criteria, outcomes, analyses) to relevant parties (eg, investigators, REC/IRBs, trial participants, trial registries, journals, regulators)                                                    | 9, 11, 14-15 |
| 5  |                               |     |                                                                                                                                                                                                                                                                                     |              |
| 6  |                               |     |                                                                                                                                                                                                                                                                                     |              |
| 7  |                               |     |                                                                                                                                                                                                                                                                                     |              |
| 8  | Consent or assent             | 26a | Who will obtain informed consent or assent from potential trial participants or authorised surrogates, and how (see Item 32)                                                                                                                                                        | 12, 14-15    |
| 9  |                               |     |                                                                                                                                                                                                                                                                                     |              |
| 10 |                               |     |                                                                                                                                                                                                                                                                                     |              |
| 11 |                               | 26b | Additional consent provisions for collection and use of participant data and biological specimens in ancillary studies, if applicable                                                                                                                                               | N/A          |
| 12 |                               |     |                                                                                                                                                                                                                                                                                     |              |
| 13 |                               |     |                                                                                                                                                                                                                                                                                     |              |
| 14 |                               |     |                                                                                                                                                                                                                                                                                     |              |
| 15 | Confidentiality               | 27  | How personal information about potential and enrolled participants will be collected, shared, and maintained in order to protect confidentiality before, during, and after the trial                                                                                                | 14-15        |
| 16 |                               |     |                                                                                                                                                                                                                                                                                     |              |
| 17 |                               |     |                                                                                                                                                                                                                                                                                     |              |
| 18 | Declaration of interests      | 28  | Financial and other competing interests for principal investigators for the overall trial and each study site                                                                                                                                                                       | 16           |
| 19 |                               |     |                                                                                                                                                                                                                                                                                     |              |
| 20 |                               |     |                                                                                                                                                                                                                                                                                     |              |
| 21 | Access to data                | 29  | Statement of who will have access to the final trial dataset, and disclosure of contractual agreements that limit such access for investigators                                                                                                                                     | 14-15        |
| 22 |                               |     |                                                                                                                                                                                                                                                                                     |              |
| 23 |                               |     |                                                                                                                                                                                                                                                                                     |              |
| 24 | Ancillary and post-trial care | 30  | Provisions, if any, for ancillary and post-trial care, and for compensation to those who suffer harm from trial participation                                                                                                                                                       | N/A          |
| 25 |                               |     |                                                                                                                                                                                                                                                                                     |              |
| 26 |                               |     |                                                                                                                                                                                                                                                                                     |              |
| 27 |                               |     |                                                                                                                                                                                                                                                                                     |              |
| 28 | Dissemination policy          | 31a | Plans for investigators and sponsor to communicate trial results to participants, healthcare professionals, the public, and other relevant groups (eg, via publication, reporting in results databases, or other data sharing arrangements), including any publication restrictions | 15           |
| 29 |                               |     |                                                                                                                                                                                                                                                                                     |              |
| 30 |                               |     |                                                                                                                                                                                                                                                                                     |              |
| 31 |                               |     |                                                                                                                                                                                                                                                                                     |              |
| 32 |                               | 31b | Authorship eligibility guidelines and any intended use of professional writers                                                                                                                                                                                                      | N/A          |
| 33 |                               |     |                                                                                                                                                                                                                                                                                     |              |
| 34 |                               | 31c | Plans, if any, for granting public access to the full protocol, participant-level dataset, and statistical code                                                                                                                                                                     | 15           |
| 35 |                               |     |                                                                                                                                                                                                                                                                                     |              |
| 36 |                               |     |                                                                                                                                                                                                                                                                                     |              |
| 37 | <b>Appendices</b>             |     |                                                                                                                                                                                                                                                                                     |              |
| 38 |                               |     |                                                                                                                                                                                                                                                                                     |              |
| 39 | Informed consent materials    | 32  | Model consent form and other related documentation given to participants and authorised surrogates                                                                                                                                                                                  | N/A          |
| 40 |                               |     |                                                                                                                                                                                                                                                                                     |              |
| 41 |                               |     |                                                                                                                                                                                                                                                                                     |              |
| 42 |                               |     |                                                                                                                                                                                                                                                                                     |              |
| 43 |                               |     |                                                                                                                                                                                                                                                                                     |              |
| 44 |                               |     |                                                                                                                                                                                                                                                                                     |              |
| 45 |                               |     |                                                                                                                                                                                                                                                                                     |              |
| 46 |                               |     |                                                                                                                                                                                                                                                                                     |              |

1 Biological 33 Plans for collection, laboratory evaluation, and storage of biological specimens for genetic or molecular N/A  
2 specimens analysis in the current trial and for future use in ancillary studies, if applicable  
3

---

4 \*It is strongly recommended that this checklist be read in conjunction with the SPIRIT 2013 Explanation & Elaboration for important clarification on the items.  
5 Amendments to the protocol should be tracked and dated. The SPIRIT checklist is copyrighted by the SPIRIT Group under the Creative Commons  
6 "Attribution-NonCommercial-NoDerivs 3.0 Unported" license.  
7  
8  
9  
10  
11  
12  
13  
14  
15  
16  
17  
18  
19  
20  
21  
22  
23  
24  
25  
26  
27  
28  
29  
30  
31  
32  
33  
34  
35  
36  
37  
38  
39  
40  
41  
42  
43  
44  
45  
46

For peer review only



# BMJ Open

## Formative evaluation of an emergency department clinical decision support system for agitation symptoms: a study protocol

|                                 |                                                                                                                                                                                                                                                                                                                                                                                                                                                                                                                                                                                                                                                                                                                                                                                                                                                                                                                                                                                                                                                                                                                                                                                                                                  |
|---------------------------------|----------------------------------------------------------------------------------------------------------------------------------------------------------------------------------------------------------------------------------------------------------------------------------------------------------------------------------------------------------------------------------------------------------------------------------------------------------------------------------------------------------------------------------------------------------------------------------------------------------------------------------------------------------------------------------------------------------------------------------------------------------------------------------------------------------------------------------------------------------------------------------------------------------------------------------------------------------------------------------------------------------------------------------------------------------------------------------------------------------------------------------------------------------------------------------------------------------------------------------|
| Journal:                        | <i>BMJ Open</i>                                                                                                                                                                                                                                                                                                                                                                                                                                                                                                                                                                                                                                                                                                                                                                                                                                                                                                                                                                                                                                                                                                                                                                                                                  |
| Manuscript ID                   | bmjopen-2023-082834.R1                                                                                                                                                                                                                                                                                                                                                                                                                                                                                                                                                                                                                                                                                                                                                                                                                                                                                                                                                                                                                                                                                                                                                                                                           |
| Article Type:                   | Protocol                                                                                                                                                                                                                                                                                                                                                                                                                                                                                                                                                                                                                                                                                                                                                                                                                                                                                                                                                                                                                                                                                                                                                                                                                         |
| Date Submitted by the Author:   | 31-Jan-2024                                                                                                                                                                                                                                                                                                                                                                                                                                                                                                                                                                                                                                                                                                                                                                                                                                                                                                                                                                                                                                                                                                                                                                                                                      |
| Complete List of Authors:       | <p>Wong, Ambrose; Yale New Haven Health System<br/> Nath, Bidisha; Department of Emergency Medicine, Yale School of Medicine<br/> Shah, Dhruvil; Department of Emergency Medicine, Yale School of Medicine<br/> Kumar, Anusha; Department of Emergency Medicine, Yale School of Medicine<br/> Brinker, Morgan; Department of Emergency Medicine, Yale School of Medicine<br/> Faustino, Isaac; Yale University, Emergency Medicine<br/> Boyce, Michael; Yale New Haven Health System<br/> Dziura, James; Department of Emergency Medicine, Yale School of Medicine; Department of Biostatistics, Yale School of Public Health<br/> Heckmann, Rebekah; Yale University, Department of Emergency Medicine<br/> Yonkers, Kimberly A.; University of Massachusetts System<br/> Bernstein, Steven L.; Dartmouth-Hitchcock Medical Center, Emergency Medicine<br/> Adapa, Karthik; University of North Carolina System, Carolina Health Informatics Program<br/> Taylor, Richard; Yale University, Emergency Medicine<br/> Ovchinnikova, Polina; Yale University School of Public Health<br/> McCall, Terika; Yale University School of Public Health<br/> Melnick, Edward; Yale University School of Medicine, Emergency Medicine</p> |
| <b>Primary Subject Heading</b>: | Emergency medicine                                                                                                                                                                                                                                                                                                                                                                                                                                                                                                                                                                                                                                                                                                                                                                                                                                                                                                                                                                                                                                                                                                                                                                                                               |
| Secondary Subject Heading:      | Evidence based practice, Health informatics, Health services research, Mental health, Patient-centred medicine                                                                                                                                                                                                                                                                                                                                                                                                                                                                                                                                                                                                                                                                                                                                                                                                                                                                                                                                                                                                                                                                                                                   |
| Keywords:                       | MENTAL HEALTH, PSYCHIATRY, Health informatics < BIOTECHNOLOGY & BIOINFORMATICS, Clinical Trial, ACCIDENT & EMERGENCY MEDICINE, Information technology < BIOTECHNOLOGY & BIOINFORMATICS                                                                                                                                                                                                                                                                                                                                                                                                                                                                                                                                                                                                                                                                                                                                                                                                                                                                                                                                                                                                                                           |
|                                 |                                                                                                                                                                                                                                                                                                                                                                                                                                                                                                                                                                                                                                                                                                                                                                                                                                                                                                                                                                                                                                                                                                                                                                                                                                  |

1  
2  
3  
4  
5  
6  
7  
8  
9  
10  
11  
12  
13  
14  
15  
16  
17  
18  
19  
20  
21  
22  
23  
24  
25  
26  
27  
28  
29  
30  
31  
32  
33  
34  
35  
36  
37  
38  
39  
40  
41  
42  
43  
44  
45  
46  
47  
48  
49  
50  
51  
52  
53  
54  
55  
56  
57  
58  
59  
60

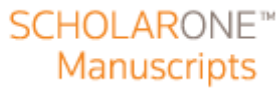

## Formative evaluation of an emergency department clinical decision support system for agitation symptoms: a study protocol

Ambrose H. Wong, MD, MEd, MHS<sup>1,3</sup>; Bidisha Nath, MBBS, MPH<sup>1</sup>; Dhruvil Shah, BS<sup>1</sup>; Anusha Kumar, ScM<sup>1</sup>; Morgan Brinker, BA<sup>1</sup>; Isaac V. Faustino, MS<sup>1</sup>; James D. Dziura, MPH, PhD<sup>1,2</sup>; Rebekah Heckmann, MD, MPH, MPA<sup>1,3,4</sup>, MPA; Kimberly A. Yonkers, MD<sup>5</sup>; Steven L. Bernstein, MD<sup>6</sup>; Karthik Adapa, PhD, MBBS, MPP, MPH<sup>7</sup>; Michael Boyce, PhD<sup>1,3</sup>; R. Andrew Taylor, MD, MHS<sup>1,2,3</sup>; Polina Ovchinnikova, BS<sup>8</sup>; Terika McCall, PhD, MPH, MBA<sup>2,8,9</sup>; Edward R. Melnick, MD, MHS<sup>1,2,3,8</sup>

### Author affiliations:

<sup>1</sup>Department of Emergency Medicine, Yale School of Medicine, New Haven, CT, USA

<sup>2</sup>Department of Biostatistics, Yale School of Public Health, New Haven, CT, USA

<sup>3</sup>Yale-New Haven Health System, New Haven, CT, USA

<sup>4</sup>Center for Outcomes Research & Evaluation (CORE), Yale School of Medicine, New Haven, CT, USA

<sup>5</sup>Department of Psychiatry, University of Massachusetts Chan Medical School, Worcester, MA, USA

<sup>6</sup>Department of Emergency Medicine, Geisel School of Medicine at Dartmouth, Lebanon, NH, USA

<sup>7</sup>Department of Radiation Oncology, The University of North Carolina at Chapel Hill, Chapel Hill, NC, USA

<sup>8</sup>Section of Biomedical Informatics and Data Science, Yale School of Medicine, New Haven, CT, USA

<sup>9</sup>Center for Interdisciplinary Research on AIDS (CIRA), Yale School of Public Health, New Haven, CT, USA

### Correspondence to:

Ambrose H Wong, MD, MEd, MHS

Yale School of Medicine

Department of Emergency Medicine

464 Congress Avenue Suite 260

New Haven, CT 06519,

USA

Email: [wongambrose@gmail.com](mailto:wongambrose@gmail.com)

Word count: 3,968

**Keywords:** mental health; emergency medicine; psychiatry; agitation; teamwork; dissemination and implementation; health services research; protocol; decision support; health informatics; clinical trial

## ABSTRACT

### Introduction

The burden of mental health related visits to emergency departments (EDs) is growing, and agitation episodes are prevalent with such visits. Best practice guidance from experts recommends early assessment of at-risk populations and pre-emptive intervention using de-escalation techniques to prevent agitation. Time pressure, fluctuating work demands, and other systems-related factors pose challenges to efficient decision-making and adoption of best practice recommendations during an unfolding behavioral crisis. As such, we propose to design, develop, and evaluate a computerized clinical decision support (CDS) system, Early Detection and Treatment to Reduce Events with Agitation Tool (ED-TREAT). We aim to identify patients at risk of agitation and guide ED clinicians through appropriate risk assessment and timely interventions to prevent agitation with a goal of minimizing restraint use and improving patient experience and outcomes.

### Methods and analysis

This study describes the formative evaluation of the health-record embedded CDS tool. Under Aim 1, the study will collect qualitative data to design and develop ED-TREAT using a contextual design approach and an iterative user-centered design process. Participants will include potential CDS users, i.e., ED physicians, nurses, technicians, as well as patients with lived experience of restraint use for behavioral crisis management during an ED visit. We will use purposive sampling to ensure the full spectrum of perspectives until we reach thematic saturation. Next under Aim 2, the study will conduct a pilot, randomized controlled trial of ED-TREAT at two adult ED sites in a regional health system in the Northeast United States to evaluate the feasibility, fidelity, and bedside acceptability of ED-TREAT. We aim to recruit a total of at least 26 eligible subjects under the pilot trial.

### Ethics and dissemination

Ethical approval by the Yale University Human Investigation Committee was obtained in 2021 (HIC# 2000030893 and 2000030906). All participants will provide informed verbal consent prior to being enrolled in the study. Results will be disseminated through publications in open-access, peer-reviewed journals, via scientific presentations, or through direct email notifications.

### Study registration

The pilot trial is registered on ClinicalTrials.gov, NCT04959279.

## ARTICLE SUMMARY

### Strengths and limitations of this study

- With limited prior evidence on real-life implementation of best practice recommendations to prevent development of agitation symptoms in an acute care setting, this study aims to identify patient and user-centered strategies to develop a clinical decision support (CDS) system that facilitates management of agitation in an acute care setting.
- Our tool will include pragmatic strategies to implement best practice recommendations for risk assessment and timely de-escalation techniques in agitation management *prior* to definitive psychiatric treatment.
- The CDS design process will follow an iterative, user-centered approach with feedback from end-users at every step to refine and develop an electronic health record-embedded, fully functional prototype.
- Our risk assessment data, qualitative design, and pilot trial will arise from the same geo-political area and health system, which may limit generalizability.

1  
2  
3  
4  
5  
6  
7  
8  
9  
10  
11  
12  
13  
14  
15  
16  
17  
18  
19  
20  
21  
22  
23  
24  
25  
26  
27  
28  
29  
30  
31  
32  
33  
34  
35  
36  
37  
38  
39  
40  
41  
42  
43  
44  
45  
46  
47  
48  
49  
50  
51  
52  
53  
54  
55  
56  
57  
58  
59  
60

For peer review only

## 1 INTRODUCTION

2 Behavioral health related visits to emergency departments (EDs) are growing.[1-3] Agitation, defined as  
3 excessive psychomotor activity leading to aggressive and violent behavior,[4] is a frequent symptom of  
4 such visits. An estimated 1.7 million agitation episodes occur annually in EDs across the United States  
5 alone.[5,6] When an individual becomes agitated, they may cause harm to themselves, hospital staff, and  
6 property.[7-9] Rapid management of agitation is imperative and use of physical restraint may be  
7 necessary to facilitate patient assessment and prevent injury.[5] Although physical restraints are routinely  
8 used in the ED,[10,11] they are associated with up to 37% risk of injury in patients, including blunt chest  
9 trauma, asphyxiation, respiratory depression, to sudden death.[12-17] To address these challenges, the  
10 American Association for Emergency Psychiatry sponsored Project BETA (Best Practices in Evaluation  
11 and Treatment of Agitation).[18] Project BETA was a pioneer effort to create a comprehensive list of five  
12 sets of best practices for preventing and managing agitation through multidisciplinary consensus panels.  
13 Key strategies within Project BETA included use of structured risk assessment[4] to help clinicians screen  
14 patients at risk of developing agitation and pre-emptive intervention using behavioral techniques,[19]  
15 environmental modification,[20] and consensual use of medication therapy[18] to obviate use of  
16 restraints.

17  
18 Despite these established best practice recommendations, multiple systems level barriers challenge their  
19 practical implementation.[21-23] Care delivery in the ED occurs in a uniquely complex environment.  
20 Clinical decisions are made under time pressure, using limited information, and amidst multiple and  
21 frequent interruptions and other unpredictable factors due to the dynamic course of acute, undifferentiated  
22 conditions.[24] As burden on the emergency care system rises in the U.S.,[25-28] these systems-level  
23 challenges are particularly relevant for patients at risk for agitation, as behavioral and de-escalation  
24 techniques require investment in time and effort to build a strong rapport and trusting therapeutic  
25 relationship with the patient. Given that clinicians may have difficulty accurately identifying patients at  
26 risk for agitation and access to expert psychiatric evaluation in such settings may be limited,[29-32] there  
27 is a significant mismatch between resources available and application of those resources to individuals  
28 who would most benefit from early risk assessment and intervention. A recent prospective study  
29 observing 100 at-risk patients in the ED found that over 60% of individuals develop agitation more than  
30 30 minutes into their visit,[33-35] presenting opportunities to prevent agitation earlier in the course.

31  
32 Clinical decision support (CDS) tools can help address systems-based challenges, facilitate risk  
33 assessment, and guide clinicians to use best practices strategies recommended by Project BETA in the

ED. CDS tools show increasing promise in the emergency setting to help clinical staff identify high-risk patients and provide more efficient and higher quality of care,[36] including individuals requiring use of high-cost imaging[37] and older adults.[38-41] A CDS system encompasses any on-screen tool designed to improve healthcare delivery by enhancing medical decisions with targeted clinical knowledge, patient data, and other health-related information.[42] Use of a CDS tool to assist in assessment and management of potentially agitated patients may be an effective strategy in the ED.[40,43,44]

## Rationale and aims

This study is one of the first that aims to prevent agitation and improve outcomes for ED patients with agitation. We will achieve this by (Figure 1):

1. Designing and developing an EHR-embedded, user-centered, CDS system, Early Detection and Treatment to Reduce Events with Agitation Tool (ED-TREAT), using a contextual design approach to obtain input from key stakeholders and iterative user-centered design process; and
2. Conducting a pilot study to evaluate the feasibility, fidelity, and bedside acceptability of ED-TREAT. ED-TREAT aims to help ED staff and clinicians to identify patients at high-risk for developing agitation, guide them through appropriate risk assessment and efficient decision-making to implement best practice recommendations to prevent development of agitation, and minimize use of restraints.

We hypothesize that, with the use of ED-TREAT, ED staff will be able to identify at-risk individuals, conduct appropriate risk-assessment, implement interventions to minimize use of restraints and improve patient experience and outcomes related to agitation management in the ED. If this study is successful, a planned subsequent clinical effectiveness trial will compare effectiveness of ED-TREAT to usual care across multiple ED sites in the future. The long-term goal of this CDS tool is to increase fidelity with best practice recommendations for prevention of agitation through early use of behavioral techniques prior to onset of agitation.

## METHODS AND ANALYSIS

### Patient and public involvement

1 67 We invited patients to help us design, develop, and test the intervention so that it is designed to improve  
2 68 the public good and help individuals with lived experience of mental illness and behavioral crises. In  
3 68  
4  
5 69 addition, we will solicit patient feedback and guidance on dissemination of study results to participants  
6  
7 70 and the local community through networks at our affiliated community-based organizations that have had  
8  
9 71 sustained engagement with our team for several years to implement a research agenda in agitation care  
10 72 that is patient-centered and recovery-oriented.  
11  
12 73

### 13 74 **Aim 1: Developing and refining ED-TREAT**

15 75 With the goal of developing a final prototype that maximizes usability, staff self-efficacy, satisfaction,  
16  
17 76 and patient-centered care, ED-TREAT will be designed, developed, and refined in three phases (P1-P3)  
18  
19 77 (**Figure 2**). During phase 1 (P1), we will conduct a needs assessment to collect input from key  
20  
21 78 stakeholders including ED physicians, nurses, patient care technicians, behavioral health experts,  
22 79 informatics experts, and patients with lived experience of being in restraints in the ED. We will combine  
23  
24 80 needs assessment findings with Project BETA recommendations for agitation management in the ED[5]  
25  
26 81 and risk factors for agitation from the literature to design an initial prototype. Next, in phase 2 (P2), we  
27 82 will conduct formative usability testing, which will consist of "think aloud" protocols, a standard usability  
28  
29 83 procedure for CDS design[45], with clinician users and standardized patients in a controlled simulation  
30  
31 84 setting to guide further modifications of the tool in an iterative fashion. Finally, in phase 3 (P3), we will  
32  
33 85 conduct field testing in the ED through observational workflow analyses to identify and address barriers  
34 86 in the real-world clinical environment.  
35  
36 87

### 37 38 88 Participant recruitment

39 89 We will design ED-TREAT for use by staff members that work mostly closely with agitated patients in  
40  
41 90 the ED.[7,35,46-48] These consist of ED physicians, nurses, and patient care technicians. We plan to  
42  
43 91 recruit these staff participants via email and biweekly staff meetings. In addition, we will also recruit  
44  
45 92 patients with prior lived experience of being restrained in the ED to solicit their input and ensure that  
46 93 patient-centered practices are considered during the design process. We will recruit these patients from  
47  
48 94 the pool of peer support workers from local community-based recovery organizations via email and  
49  
50 95 presentations at monthly staff meetings. These peer support workers have a history of mental health and  
51  
52 96 substance use disorders and have received training to become employed as patient advocates on  
53 97 community-based treatment teams. Finally, our design team will interview informatics and behavioral  
54  
55 98 health experts to solicit ideas and relevant CDS design strategies to improve decision-making during  
56  
57 99 agitation management.[49,50]  
58  
59  
60



### Phase 1: Needs assessment and initial design of ED-TREAT

We will conduct focus groups and observations starting June 2023 via a contextual inquiry[36] approach. This approach seeks to engage prospective users and participants described above to understand clinical workflow, roles of different members of the patient care team, and thought processes involved in managing a behavioral health crisis in the ED. We will first conduct in-depth qualitative interviews with staff and patient participants using a semi-structured interview guide that will include open-ended questions to cover topics (**Supplemental Table 1**) related to application of Project BETA recommendations in preventing agitation and user-centered design.[37] Each focus group will consist of 2-5 participants from the same stakeholder group and be approximately 60 minutes duration. Sessions will be audio recorded after obtaining participant verbal consent (**S1**). In addition, members of the design team will conduct observation sessions in the ED to observe ED staff during real-life agitation management events. These sessions will provide information about environmental and systems contexts, interactions amongst members of patient care team during an active agitation episode, logistics of integrating CDS tool into EHR workflow to facilitate clinical decision-making.

After identifying crucial user requirements in P1, we will develop an initial low-fidelity prototype for ED-TREAT. This will occur in collaboration with EHR analysts and informatics experts by incorporating Project BETA recommendations for preventing and managing agitation[5] and potential risk factors for agitation to identify potential at-risk patients in the ED. These risk factors (**Supplemental Table 2**) will be based on existing literature on risk factors for agitation and workplace violence in the healthcare setting[4,42,51] our team's prior work on agitation management in the ED,[48] patient perspectives of ED visits resulting in restraint use,[52] characterization of physical restraint use among adults presenting to the ED with agitation,[11] and attributes and levels of agitation impacting thresholds for restraint use in the ED.[34,35]

Preliminary work by our team has shown that identifying risk factors for agitation and implementing EHR-based interventions for agitation are feasible in the emergency setting.[46] The CDS will extract patient specific data on variables of interest from existing patient chart data via EPIC's Cogito analytics performance suite.[53] Based on current expert recommendations from Project BETA[46], we anticipate that ED-TREAT will likely stratify patients into three risk groups (**Table 1**) and recommend increasing levels of resource utilization and pre-emptive management as the risk level increases based on best practices for preventing agitation from Project BETA. Depending on results from the needs assessment,

ED-TREAT's recommendations may include automated order sets for medication therapy, staff instructions and communication orders, and templated clinical documentation. Our team will collaborate with EHR analysts to create an initial interactive prototype within the EHR testing environment, "Epic Playground", a non-production, functional, simulated EHR replica used for developing and validating new workflows. We anticipate that our final product will be an EHR-integrated web application through a dedicated graphical Application Programming Interface.[54]

**Table 1.** Sample elements of initial ED-TREAT prototype

| Risk Level       | Project BETA[5] guidelines                                                                              | Recommended tasks                                                                                                                                                                                                                                                          |
|------------------|---------------------------------------------------------------------------------------------------------|----------------------------------------------------------------------------------------------------------------------------------------------------------------------------------------------------------------------------------------------------------------------------|
| Negligible       | (1) Medical evaluation & triage[13]                                                                     | <ul style="list-style-type: none"> <li>Medical history &amp; physical exam</li> <li>Early vital signs and fingerstick glucose</li> <li>Address psychosocial needs &amp; establish rapport</li> <li>Standardize assessment to avoid structural biases/inequities</li> </ul> |
| Mild to moderate | (2) Psychiatric evaluation & risk assessment[55]<br>(3) Psychopharmacology[18]                          | <u>Tasks in negligible risk level PLUS:</u> <ul style="list-style-type: none"> <li>Measure Behavioral Activity Rating Scale (BARS)[56]</li> <li>Offer voluntary oral medication (with allergies cross-checked)</li> </ul>                                                  |
| High             | (4) Environmental modification (avoidance of restraint & seclusion)[20]<br>(5) Verbal de-escalation[19] | <u>Tasks in mild to moderate risk level PLUS:</u> <ul style="list-style-type: none"> <li>Alert clinician early (from triage/nursing assessment)</li> <li>Pre-emptive verbal de-escalation (ten domains)</li> <li>Move to quiet, low activity/volume area</li> </ul>        |

## Phase 2: Usability testing of ED-TREAT

### *Heuristic evaluation*

We will first perform heuristic evaluation[57] of CDS interface usability before testing with clinician participants. This will consist of an expert team of three evaluators with experience in emergency medicine as well as CDS design who will navigate through different aspects of the CDS and judge the compliance and usability of the tool in agitation management triangulated between their expertise and usability standards. Each evaluator will inspect the interface and assess the guidelines and recommendations provided by the CDS for various levels of agitation. After individual assessment is completed, we will debrief as a group and aggregate the results of each evaluator to examine deficiencies in the prototype design. After addressing concerns and refining the prototype CDS tool, we will conduct further usability testing with clinicians in simulated training protocols.

### *"Think Aloud" Protocol*

Next, our team will perform one-on-one "think aloud" protocol[45] sessions with clinician users in a quiet office at the EHR training classroom. We will ask participants to perform designated tasks with ED-

TREAT using mock patient charts in Epic Playground and “think aloud” how they would use ED-TREAT to test whether the user understands and is using the CDS as intended. We will develop a facilitator guide that focuses on domains related to usability of the prototype and design of the CDS interface (**Supplemental Table 3**). We will video-record each usability testing session, incorporating user screen captures and field notes[58] taken during the session. At the end of the session, each participant will complete the System Usability Scale[59] to measure perceived usability of and satisfaction with a health informatics tool. The System Usability Scale is a widely used and effective survey composed of ten statements assessed on a 5-point Likert scale, with inter-item correlations of 0.69-0.75 and a reliability coefficient  $\alpha$  of 0.91.[60] Each session is expected to take 30 minutes.

### *Simulation sessions*

Additionally, we will observe the clinical team in a simulation session with a live actor or mannequin simulating being an agitated patient. Participants will be briefed on how the CDS tool works and will be encouraged to use it at various points in the care process. We will similarly video-record each session and distribute the System Usability Scale to gather participant feedback. We will make iterative refinements to the prototype until the team reaches consensus that it has reached a threshold level of usability.

### Phase 3: Field testing of ED-TREAT

We will recruit staff participants working in the ED for field testing of the ED-TREAT prototype through observational workflow analysis of ED visits with mild-moderate or high risk of agitation (**Table 1**). We will develop an observational guide based on sample topics of usability testing (**Supplemental Table 3**) that will detail both the workflow of managing an at-risk patient and barriers to adopting ED-TREAT in the clinical environment. Field notes will detail events, actions, and their time and duration,[58] while maintaining an open-ended format to describe and follow variations or workarounds in workflow. Either the PI or a trained research associate will complete the observations as an unobtrusive non-participant observer through a patient’s visit from ED arrival to patient disposition, similar to procedures we developed for prior observations of agitation.[34,35] We will enter field notes using a portable electronic tablet into a word document for free text and a spreadsheet for data elements.

### Data analysis

In P1 (design and development), our team will use the iterative and phased approach of building an affinity diagram, a commonly used organizational tool that allows large numbers of ideas stemming from brainstorming and qualitative data to be sorted into groups, based on their natural relationships, for review

1 189 and analysis.[61,62] Following completion of each focus group and contextual inquiry session, we will  
2 190 conduct an interpretation session to review the user-provided key notes from the inquiry session and  
3 191 capture them as affinity notes.[63] To help identify common issues, work patterns, and needs, we will  
4 192 arrange the affinity notes into hierarchical categories (“must-have,” “good to have”, and “nice to have”)  
5 193 based on common themes in the data to create an affinity diagram.[63] Building of the affinity diagram  
6 194 will occur online using Miro software (RealtimeBoard, Inc, San Francisco, CA, United States).[64] We  
7 195 will mock up a low fidelity prototype of ED-TREAT based on current best practices and iteratively refine  
8 196 it based on user data from P1.

9 197  
10 198 For P2 (usability testing) and P3 (field testing), field notes will be analyzed using a deductive coding  
11 199 method to conduct directed content analysis[65] based on predetermined usability requirements and  
12 200 recommended tasks from ED-TREAT (**Supplemental Table 3**).[66] We will use Dedoose (SocioCultural  
13 201 Research Consultants, Manhattan Beach, CA, United States),[67] a collaborative and cloud-based  
14 202 qualitative software package, for thematic analysis and data organization of transcripts. Codes identifying  
15 203 suboptimal or deficient performance of the prototype will uncover critical system factors impacting  
16 204 adoption and usability that need optimization and adjustment. Two trained reviewers will perform  
17 205 independent coding and we will calculate inter-rater reliability assessments with kappa scores. For the  
18 206 System Usability Scale,[59] participants’ scores from each question of are added together and then  
19 207 multiplied by 2.5 to convert the original scores to continuous data from 0-100. Scores will be described  
20 208 using mean and standard deviation and >85 will be indicative of excellent usability.[68] We will use the  
21 209 results generated from this analysis process at each round of revisions to make appropriate adjustments to  
22 210 the ED-TREAT prototype in close collaboration with the EHR analyst team until we derive a final  
23 211 deliverable prototype that will be ready for the pilot trial.

#### 24 212 25 213 Sample size

26 214 We will use purposive sampling[69] to ensure the full spectrum of perspectives for clinicians who will  
27 215 engage with ED-TREAT and peer support workers who have had experience as patients in the ED. We  
28 216 will conduct data collection until reaching thematic saturation,[70] when new concepts no longer emerge  
29 217 from iterative analysis of the data.[71] For initial design (P1), we anticipate that this will occur after five  
30 218 to six focus groups with six participants (staff and patients) in each focus group.[72] As enrollment of 10-  
31 219 12 subjects can identify up to 90% of usability problems,[73] we will perform usability testing (P2) for  
32 220 approximately five participants in each round of refinement and expect about three rounds of refinement

(15 participants total) as per our prior published work.[74] For field testing (P3), we plan to observe eight patient encounters to detect any usability problems when deployed in the ED.

## **Aim 2: Pilot trial and feasibility testing**

We will conduct a pilot randomized control trial for ED-TREAT to compare the intervention to usual care. This will allow us to evaluate acceptability of the intervention to its end-users (ED staff), fidelity of its intended outcomes to identify at-risk individuals and prevent agitation, feasibility of randomization, ease of subject enrollment, and measurement of other outcomes of interest. This will be a mixed methods study, wherein we will quantitatively measure usability and efficiency of clinical decision-making via the System Usability Scale[59] and specific patient outcomes, as well as qualitatively assess the effect of ED-TREAT on clinical workflow and patient care. In addition, this pilot trial will (1) test the integrity of the study protocol in preparation for a future comparative effectiveness clinical trial, (2) evaluate randomization protocols, (3) estimate rates of recruitment and retention of trial subjects, and (4) estimate effect size for sample size calculation in the subsequent trial.[75] Pilot trials[76] are not designed to test the efficacy of the intervention, but will help establish acceptability and feasibility in preparation for a future multicenter RCT. We hypothesize that it will be feasible to implement the tool, measure identified outcomes, be acceptable to its end-users, and work as intended.

### Study setting, participants, and randomization

We will conduct the pilot trial at two adult ED campuses that belong to a large regional healthcare system in the Northeast United States, with a planned trial start date in the Fall of 2024. Prior to initiation of the pilot trial, all emergency physicians, ED nurses, and ED patient care technicians at both campuses will receive an email introduction and a link to a brief training regarding the use of ED-TREAT. Eligibility criteria for patients and recruitment will include ability to provide verbal consent for the study and a score of "4" (quiet and awake; normal level of activity) or less on the Behavioral Activity Rating Scale (BARS),[56] an accepted seven-point scale to assess levels of agitation in acute care settings. We will first perform screening for eligibility via an ED-TREAT administrative interface that performs risk assessment for each ED patient on arrival. Inclusion criteria for ED patients include adult (age $\geq$ 18) patients, presenting to the ED during the pilot trial period, deemed to have a mild-moderate or high risk of agitation as determined by ED-TREAT, do not require physical restraint orders within <30 minutes of arrival, with a score of "4" (quiet and awake; normal level of activity) on the Behavioral Activity Rating Scale, have comfort with conversational English, and able to provide verbal consent. Exclusion Criteria include presence of a restraint order <30 minutes of arrival and presence of a non-violent physical

restraint order where indications are not due to agitation (e.g., for protecting intubation or life-preserving equipment). A research associate will then approach eligible patients and their designated clinician team members for enrollment after confirming ability to consent and assessing patient BARS scores as close to the beginning of the visit as feasible. Study procedures, risks/benefits of participating, and the purpose of ED-TREAT will be described, and verbal consent will be obtained for patients and staff participants. Since we plan to enroll patients prior to onset of agitation, we anticipate that most patients should be able to engage in decisions and provide verbal consent. Our prior work found that >70% of ED patients with subsequent agitation arrived with a normal mental status and BARS scores  $\leq 4$ .<sup>[34,35]</sup> We will perform 2:1 randomization at the patient level and also recruit a higher proportion of high-risk patients in each arm, as a primary aim of the pilot trial is to test the acceptability of ED-TREAT and we anticipate that our intervention will recommend more tasks for high-risk patients. Randomization will occur using sequentially numbered, opaque, sealed envelopes that will only be opened by the research team member after enrollment of each patient. In the intervention group, ED-TREAT will automatically launch as part of the clinical team's workflow in the EHR after randomization. We anticipate that critical steps in ED-TREAT will occur at four stages of a visit (**Figure 3**): (1) at initial arrival with automated risk stratification using pre-determined criteria set during the CDS design process; (2) at triage assessment; (3) at initial nurse interaction; and (4) at initial clinician interaction. In the control group, ED-TREAT will notify the research team regarding the patient's risk group but will not launch for the clinical team's interfaces.

#### Data collection

Our anticipated data collection strategy is summarized in **Table 2**. In addition to visit characteristics (system factors, relevant clinical data) collected through the EHR during the visit, we will collect acceptability and fidelity measures, feasibility assessment, and potential outcomes of interest for each visit.

#### *Acceptability & fidelity*

For all clinicians caring for patients in the intervention group, we will administer the System Usability Scale (SUS)<sup>[59]</sup> either in person at the end of the ED visit or within 72 hours by email. In addition, we will perform observation workflow analyses as described earlier using a task checklist to determine if clinicians were using ED-TREAT as intended, and if any barriers or unintended consequences occurred because of the intervention. We will perform brief, semi-structured interviews with patients either at the

end of a visit or within one week after disposition to evaluate the impact of ED-TREAT on their experiences.

### Feasibility

To assess the feasibility of a comparative effectiveness trial, we will evaluate the following at three-month intervals: 1) available number of potential subjects (# of eligible patient visits), 2) subject identification (% of eligible patients/staff approached), 3) enrollment (% of patients/staff with consent to enroll), and 4) retention (% of visits with completed outcome measures). We will also conduct brief, semi-structured interviews with staff participants to evaluate their experiences with ED-TREAT and effect on clinical workflow.

### Outcome measures

The anticipated primary outcome of the comparative effectiveness trial will be the presence of a physical restraint order during the ED visit (> 30 minutes after arrival). Additional secondary outcomes include the presence of an intramuscular chemical sedative order, highest level of agitation on the Behavioral Activity Rating Scale (BARS)[56] during visit, disposition, and length of stay.

**Table 2.** Anticipated data collection for ED-TREAT pilot trial

| Measure                                  | Tool or strategy                                               | Timing of measurement            |
|------------------------------------------|----------------------------------------------------------------|----------------------------------|
| <i>Visit characteristics</i>             |                                                                |                                  |
| System factors                           | EHR (e.g., staff traits, National ED Overcrowding Scale)[77]   | During & end of visit            |
| Clinical data                            | EHR/ED-TREAT (e.g., risk category)                             | During & end of visit            |
| <i>Acceptability, fidelity</i>           |                                                                |                                  |
| Clinician acceptability of ED-TREAT      | System Usability Scale[59] (satisfied, useful)                 | End of visit                     |
| Fidelity of ED-TREAT                     | Observational workflow checklist (perform as intended)         | During visit                     |
| Effect on patient experience             | Qualitative interviews with patients                           | End of visit or <72h after visit |
| Potential bias or differential treatment | Implicit Association Test (for clinicians), patient interviews | End of visit or <72h after visit |
| <i>Feasibility</i>                       |                                                                |                                  |
| Available subjects                       | # of eligible visits                                           | Every 3 months                   |
| Subject identification                   | % eligible visits approached                                   | Every 3 months                   |
| Enrollment                               | % visits with consent to enroll from patient/clinical staff    | Every 3 months                   |
| Retention                                | % visits with completed measures                               | Every 3 months                   |
| Effect on clinical workflow              | Qualitative interviews with clinicians                         | Every 3 months                   |
| <i>Outcomes</i>                          |                                                                |                                  |
| Physical restraint order                 | EHR                                                            | During & end of visit            |
| Intramuscular chemical sedative order    | EHR                                                            | During & end of visit            |
| Level of agitation                       | Behavioral Activity Rating Scale (BARS)[56]                    | Highest level during visit       |
| Disposition                              | EHR                                                            | End of visit                     |

|                |     |              |
|----------------|-----|--------------|
| Length of stay | EHR | End of visit |
|----------------|-----|--------------|

### Sample size and data analysis

As this pilot trial is not designed to test the efficacy of ED-TREAT, a power calculation is not appropriate.[75] To determine the sample size for this pilot randomized trial, we will use the outcome of fidelity as measured by the proportion of visits in the intervention arm that are adherent to >80% of the observational workflow checklist. To estimate the proportion achieving this level of fidelity with a reasonable precision (95% CI with a width of +/- 20%), a total of at least 26 eligible subjects will be enrolled in the pilot trial. We will determine ratings from the System Usability Scale[59] and calculate proportions of each clinician group with scores of >85, indicating excellent usability. We will consider ED-TREAT to be acceptable if  $\geq 90\%$  of each clinician group give ratings >85. For feasibility, we will measure the proportion of potentially eligible patient visits with successful enrollment and collection of all outcomes of interest. Based on our group's anecdotal experience with pilot studies, we will consider a comparative effectiveness trial feasible if  $\geq 30\%$  of visits assessed for eligibility are enrolled and  $\geq 90\%$  of all outcome measures are collected. Qualitative data obtained from interviews will be analyzed with Dedoose using the analytic strategy mentioned earlier for iterative refinement of the study protocol in preparation for a comparative effectiveness trial.

### **ETHICS AND DISSEMINATION**

We plan to conduct our study in accordance with the Yale Institutional Review Board (IRB). We have obtained the necessary regulatory and human subjects protection approvals for each aspect or phase of our protocol. Ethical approval by the Yale University Human Investigation Committee was obtained in 2021 (HIC# 2000030893 and 2000030906). After careful review, Yale IRB has approved Aim 1 of this study to be eligible for exempt of full IRB review under 45 CFR 46.104(d)(4), since any information collected by the investigator will be in such a manner that the identity of the human subjects cannot readily be ascertained directly or through identifiers linked to the subjects. Aim 2 of the study has been approved as a full protocol for a clinical trial and is undergoing annual continuing review. As we work with structured EHR patient data, we will maintain de-identification where necessary and keep access to datasets secure. Additionally, all clinicians and patients participating in focus groups, feasibility testing, or the pilot trial will be informed of their rights as subjects. Clinicians will retain the right to retain control of their practice and patients will retain the right to not participate and request termination of participation at any point in the study. All staff, participants, and patients will provide verbal consent prior to involvement



1 334 with the study. Sample consent forms for patients and staff are included as **Supplement Materials**. The  
2 335 pilot trial is registered at ClinicalTrials.gov (Clinical Trials Registration Number: NCT04959279).  
3 336  
4

5 336  
6  
7 337 Monitoring for data integrity and safety will be the responsibility of principal investigator (AHW) and the  
8 338 Yale Human Investigation Committee, and a Data Safety Monitoring Board (DSMB). DSMB members  
9 339 will be composed of experts in care disparities and health equity for vulnerable and disadvantaged  
10 340 populations, clinical trials for mental illness and substance use disorders, measurement and risk  
11 341 stratification for disinhibited behaviors, and an expert in statistical analysis of clinical trials in emergency  
12 342 medicine. Twice annually, the DSMB will review the progress of the study and frequency of serious  
13 343 adverse events. All adverse events, as well as any unanticipated problems that arise, will be reported  
14 344 within 48 hours to the Human Investigation Committee. A full report will be provided annually or upon  
15 345 request to the IRB and the sponsor's Program Official. The effect of adverse events on the risk/benefit  
16 346 ratio of the study will be re-evaluated by the investigators with each event, with appropriate adjustments  
17 347 made to the protocol or consent forms if needed. Given the minimal risk of the study and intervention, the  
18 348 investigators do not anticipate the occurrence of any serious adverse events.  
19  
20  
21

22 349  
23  
24 350 Results and outcomes of the study will be disseminated through peer-reviewed journals and presentations  
25 351 at relevant scientific meetings throughout the study timeline. A successful pilot trial will aid in a future  
26 352 full randomized control trial to fully measure the effectiveness of the ED-TREAT CDS tool in agitation  
27 353 management in emergency department settings. At the time of publication of any manuscripts that arise  
28 354 from this research, the de-identified data for that manuscript will be made available to share for scholarly  
29 355 activities. Sharing of the data will require a Data Use Agreement to be established between the requesting  
30 356 and host institutions. Data will be shared through secure file transfer.  
31  
32  
33  
34  
35

## 36 357 37 358 **CONTRIBUTORS**

38 359  
39 360 AHW, JDD, KAY, SLB, and ERM designed the study protocol and obtained funding. AHW is  
40 361 responsible for the overall logistical and scientific aspects of the study, data collection and analysis, and  
41 362 draft of this manuscript. DS, AK, MB, PO, and IF provided administrative and logistical support for the  
42 363 study. BN, RK, KA, MB, RAT, and TM contributed statistical, scientific, and design expertise in the  
43 364 development and planned scientific activities of the protocol. All authors contributed to critical revisions  
44 365 and gave final approval of the manuscript.  
45  
46  
47  
48  
49  
50  
51  
52  
53  
54  
55  
56  
57  
58  
59  
60

## FUNDING

This study is supported by the National Institute of Mental Health (Award Number K23 MH126366). The funder had no role in the design or conduct of the study; collection, management, analysis, or interpretation of the data; preparation, review, or approval of the manuscript; or the decision to submit the manuscript for publication.

## COMPETING INTERESTS

Dr Wong reported receiving grants from National Institute of Health outside the conduct of the study. Dr. Melnick reported receiving grants and contracts from the National Institute of Health, Agency for Healthcare Research and Quality, American Medical Association, and Centers for Medicare & Medicaid Services outside of this study. Dr. McCall reported receiving grants from the National Institute of Health, Agency for Healthcare Research and Quality, and Google outside of this study. Dr. McCall is a member of the Clinical Diversity Advisory Board at Woebot Health and Advisory Board at RACE Space Inc. Dr. Heckmann reported receiving salary support from the Centers for Medicare & Medicaid Services to develop, implement, and maintain clinical performance outcome measures that are publicly reported, in addition to receiving research support from the U.S. Food and Drug Administration, Centers for Disease Control and Prevention, National Institute of Health, Connecticut Department of Public Health, and from the Community Health Network of Connecticut for her work as a medical consultant. All other authors declare no competing interests.

## References

1. Theriault KM, Rosenheck RA, Rhee TG. Increasing Emergency Department Visits for Mental Health Conditions in the United States. *The Journal of Clinical Psychiatry* 2020;81(5). DOI: 10.4088/JCP.20m13241.
2. Santillanes G, Axeen S, Lam CN, Menchine M. National trends in mental health-related emergency department visits by children and adults, 2009–2015. *The American Journal of Emergency Medicine* 2020;38(12):2536-2544. DOI: 10.1016/j.ajem.2019.12.035.
3. Capp R, Hardy R, Lindrooth R, Wiler J. National Trends in Emergency Department Visits by Adults With Mental Health Disorders. *The Journal of Emergency Medicine* 2016;51(2):131-135.e1. DOI: 10.1016/j.jemermed.2016.05.002.
4. Nordstrom K, Zun LS, Wilson MP, et al. Medical evaluation and triage of the agitated patient: consensus statement of the american association for emergency psychiatry project Beta medical evaluation workgroup. *West J Emerg Med* 2012;13(1):3-10. DOI: 10.5811/westjem.2011.9.6863.
5. Holloman GH, Jr., Zeller SL. Overview of Project BETA: Best practices in Evaluation and Treatment of Agitation. *West J Emerg Med* 2012;13(1):1-2. DOI: 10.5811/westjem.2011.9.6865.
6. Zeller SL, Rhoades RW. Systematic reviews of assessment measures and pharmacologic treatments for agitation. *Clin Ther* 2010;32(3):403-25. DOI: 10.1016/j.clinthera.2010.03.006.
7. Wong AH, Ray JM, Eixenberger C, et al. Qualitative study of patient experiences and care observations during agitation events in the emergency department: implications for systems-based practice. *BMJ Open* 2022;12(5):e059876. DOI: 10.1136/bmjopen-2021-059876.
8. Hooton A, Bloom BM, Backus B. Violence against healthcare workers at the Emergency Department. *Eur J Emerg Med* 2022;29(2):89-90. DOI: 10.1097/mej.0000000000000905.
9. Gates DM, Ross CS, McQueen L. Violence against emergency department workers. *J Emerg Med* 2006;31(3):331-7. DOI: 10.1016/j.jemermed.2005.12.028.
10. Wong AH, Whitfill T, Ohuabunwa EC, et al. Association of Race/Ethnicity and Other Demographic Characteristics With Use of Physical Restraints in the Emergency Department. *JAMA Netw Open* 2021;4(1):e2035241. DOI: 10.1001/jamanetworkopen.2020.35241.
11. Wong AH, Taylor RA, Ray JM, Bernstein SL. Physical Restraint Use in Adult Patients Presenting to a General Emergency Department. *Ann Emerg Med* 2019;73(2):183-192. DOI: 10.1016/j.annemergmed.2018.06.020.
12. Grant JR, Southall PE, Fowler DR, Mealey J, Thomas EJ, Kinlock TW. Death in custody: a historical analysis. *J Forensic Sci* 2007;52(5):1177-81. DOI: 10.1111/j.1556-4029.2007.00500.x.
13. Barnett R, Stirling C, Pandyan AD. A review of the scientific literature related to the adverse impact of physical restraint: gaining a clearer understanding of the physiological factors involved in cases of restraint-related death. *Med Sci Law* 2012;52(3):137-42. DOI: 10.1258/msl.2011.011101.
14. Zun LS. A prospective study of the complication rate of use of patient restraint in the emergency department. *J Emerg Med* 2003;24(2):119-24. DOI: 10.1016/s0736-4679(02)00738-2.
15. Korczak V, Kirby A, Gunja N. Chemical agents for the sedation of agitated patients in the ED: a systematic review. *Am J Emerg Med* 2016;34(12):2426-2431. DOI: 10.1016/j.ajem.2016.09.025.
16. Mohr WK, Petti TA, Mohr BD. Adverse effects associated with physical restraint. *Can J Psychiatry* 2003;48(5):330-7. DOI: 10.1177/070674370304800509.
17. Karger B, Fracasso T, Pfeiffer H. Fatalities related to medical restraint devices-asphyxia is a common finding. *Forensic Sci Int* 2008;178(2-3):178-84. DOI: 10.1016/j.forsciint.2008.03.016.
18. Wilson MP, Pepper D, Currier GW, Holloman GH, Jr., Feifel D. The psychopharmacology of agitation: consensus statement of the american association for emergency psychiatry project Beta psychopharmacology workgroup. *West J Emerg Med* 2012;13(1):26-34. DOI: 10.5811/westjem.2011.9.6866.

19. Richmond JS, Berlin JS, Fishkind AB, et al. Verbal De-escalation of the Agitated Patient: Consensus Statement of the American Association for Emergency Psychiatry Project BETA De-escalation Workgroup. *West J Emerg Med* 2012;13(1):17-25. DOI: 10.5811/westjem.2011.9.6864.
20. Knox DK, Holloman GH, Jr. Use and avoidance of seclusion and restraint: consensus statement of the american association for emergency psychiatry project Beta seclusion and restraint workgroup. *West J Emerg Med* 2012;13(1):35-40. DOI: 10.5811/westjem.2011.9.6867.
21. Chan EW, Taylor DM, Knott JC, Kong DC. Variation in the management of hypothetical cases of acute agitation in Australasian emergency departments. *Emerg Med Australas* 2011;23(1):23-32. DOI: 10.1111/j.1742-6723.2010.01348.x.
22. Downey LV, Zun LS, Gonzales SJ. Frequency of alternative to restraints and seclusion and uses of agitation reduction techniques in the emergency department. *Gen Hosp Psychiatry* 2007;29(6):470-4. DOI: 10.1016/j.genhosppsych.2007.07.006.
23. Richardson SK, Ardagh MW, Morrison R, Grainger PC. Management of the aggressive emergency department patient: non-pharmacological perspectives and evidence base. *Open Access Emerg Med* 2019;11:271-290. DOI: 10.2147/oaem.S192884.
24. Kovacs G, Croskerry P. Clinical decision making: an emergency medicine perspective. *Acad Emerg Med* 1999;6(9):947-52. DOI: 10.1111/j.1553-2712.1999.tb01246.x.
25. Hooker EA, Mallow PJ, Oglesby MM. Characteristics and Trends of Emergency Department Visits in the United States (2010-2014). *J Emerg Med* 2019;56(3):344-351. DOI: 10.1016/j.jemermed.2018.12.025.
26. Lane BH, Mallow PJ, Hooker MB, Hooker E. Trends in United States emergency department visits and associated charges from 2010 to 2016. *Am J Emerg Med* 2020;38(8):1576-1581. DOI: 10.1016/j.ajem.2019.158423.
27. Peterson SM, Harbertson CA, Scheulen JJ, Kelen GD. Trends and Characterization of Academic Emergency Department Patient Visits: A Five-year Review. *Acad Emerg Med* 2019;26(4):410-419. DOI: 10.1111/acem.13550.
28. Skinner HG, Blanchard J, Elixhauser A. Trends in Emergency Department Visits, 2006-2011. Healthcare Cost and Utilization Project (HCUP) Statistical Briefs. Rockville (MD)2006.
29. Chang G, Weiss AP, Orav EJ, et al. Bottlenecks in the emergency department: the psychiatric clinicians' perspective. *Gen Hosp Psychiatry* 2012;34(4):403-9. DOI: 10.1016/j.genhosppsych.2012.03.005.
30. Nordstrom K, Berlin JS, Nash SS, Shah SB, Schmelzer NA, Worley LLM. Boarding of Mentally Ill Patients in Emergency Departments: American Psychiatric Association Resource Document. *West J Emerg Med* 2019;20(5):690-695. DOI: 10.5811/westjem.2019.6.42422.
31. Richmond JS, Dragatsi D, Stiebel V, Rozel JS, Rasimas JJ. American Association for Emergency Psychiatry Recommendations to Address Psychiatric Staff Shortages in Emergency Settings. *Psychiatr Serv* 2021;72(4):437-443. DOI: 10.1176/appi.ps.201900501.
32. Zun LS. An issue of equity of care: psychiatric patients must be treated "on par" with medical patients. *Am J Psychiatry* 2014;171(7):716-9. DOI: 10.1176/appi.ajp.2014.14010002.
33. Wong AH, Combellick J, Wispelwey BA, Squires A, Gang M. The Patient Care Paradox: An Interprofessional Qualitative Study of Agitated Patient Care in the Emergency Department. *Acad Emerg Med* 2017;24(2):226-235. DOI: 10.1111/acem.13117.
34. Wong AH, Crispino L, Parker J, et al. Use of sedatives and restraints for treatment of agitation in the emergency department. *Am J Emerg Med* 2019;37(7):1376-1379. DOI: 10.1016/j.ajem.2018.12.027.
35. Wong AH, Crispino L, Parker JB, et al. Characteristics and Severity of Agitation Associated With Use of Sedatives and Restraints in the Emergency Department. *J Emerg Med* 2019;57(5):611-619. DOI: 10.1016/j.jemermed.2019.07.019.

36. Miller A, Koola JD, Matheny ME, et al. Application of contextual design methods to inform targeted clinical decision support interventions in sub-specialty care environments. *Int J Med Inform* 2018;117:55-65. DOI: 10.1016/j.ijmedinf.2018.05.005.
37. Maguire M. Methods to support human-centred design. *International Journal of Human-Computer Studies* 2001;55(4):587-634. DOI: <https://doi.org/10.1006/ijhc.2001.0503>.
38. Kwan JL, Lo L, Ferguson J, et al. Computerised clinical decision support systems and absolute improvements in care: meta-analysis of controlled clinical trials. *BMJ* 2020;370:m3216. DOI: 10.1136/bmj.m3216.
39. Bright TJ, Wong A, Dhurjati R, et al. Effect of clinical decision-support systems: a systematic review. *Ann Intern Med* 2012;157(1):29-43. DOI: 10.7326/0003-4819-157-1-201207030-00450.
40. Kawamoto K, Houlihan CA, Balas EA, Lobach DF. Improving clinical practice using clinical decision support systems: a systematic review of trials to identify features critical to success. *BMJ* 2005;330(7494):765. DOI: 10.1136/bmj.38398.500764.8F.
41. Garg AX, Adhikari NK, McDonald H, et al. Effects of computerized clinical decision support systems on practitioner performance and patient outcomes: a systematic review. *JAMA* 2005;293(10):1223-38. DOI: 10.1001/jama.293.10.1223.
42. Phillips JP. Workplace Violence against Health Care Workers in the United States. *N Engl J Med* 2016;375(7):e14. DOI: 10.1056/NEJMc1606816.
43. Musen MA, Middleton B, Greenes RA. Clinical Decision-Support Systems. In: Shortliffe EH, Cimino JJ, eds. *Biomedical Informatics: Computer Applications in Health Care and Biomedicine*. London: Springer London; 2014:643-674.
44. Dean NC, Jones BE, Jones JP, et al. Impact of an Electronic Clinical Decision Support Tool for Emergency Department Patients With Pneumonia. *Ann Emerg Med* 2015;66(5):511-20. DOI: 10.1016/j.annemergmed.2015.02.003.
45. Li AC, Kannry JL, Kushniruk A, et al. Integrating usability testing and think-aloud protocol analysis with "near-live" clinical simulations in evaluating clinical decision support. *Int J Med Inform* 2012;81(11):761-72. DOI: 10.1016/j.ijmedinf.2012.02.009.
46. Roppolo LP, Morris DW, Khan F, et al. Improving the management of acutely agitated patients in the emergency department through implementation of Project BETA (Best Practices in the Evaluation and Treatment of Agitation). *J Am Coll Emerg Physicians Open* 2020;1(5):898-907. DOI: 10.1002/emp2.12138.
47. Wong AH, Auerbach MA, Ruppel H, et al. Addressing Dual Patient and Staff Safety Through A Team-Based Standardized Patient Simulation for Agitation Management in the Emergency Department. *Simul Healthc* 2018;13(3):154-162. DOI: 10.1097/sih.0000000000000309.
48. Wong AH, Ruppel H, Crispino LJ, Rosenberg A, Iennaco JD, Vaca FE. Deriving a Framework for a Systems Approach to Agitated Patient Care in the Emergency Department. *Jt Comm J Qual Patient Saf* 2018;44(5):279-292. DOI: 10.1016/j.jcjq.2017.11.011.
49. Agboola IK, Coupet E, Jr., Wong AH. "The Coats That We Can Take Off and the Ones We Can't": The Role of Trauma-Informed Care on Race and Bias During Agitation in the Emergency Department. *Ann Emerg Med* 2021;77(5):493-498. DOI: 10.1016/j.annemergmed.2020.11.021.
50. Jin RO, Anaebere TC, Haar RJ. Exploring bias in restraint use: Four strategies to mitigate bias in care of the agitated patient in the emergency department. *Acad Emerg Med* 2021;28(9):1061-1066. DOI: 10.1111/acem.14277.
51. Hahn S, Muller M, Hantikainen V, Kok G, Dassen T, Halfens RJ. Risk factors associated with patient and visitor violence in general hospitals: results of a multiple regression analysis. *Int J Nurs Stud* 2013;50(3):374-85. DOI: 10.1016/j.ijnurstu.2012.09.018.
52. Wong AH, Ray JM, Rosenberg A, et al. Experiences of Individuals Who Were Physically Restrained in the Emergency Department. *JAMA Netw Open* 2020;3(1):e1919381. DOI: 10.1001/jamanetworkopen.2019.19381.

53. Epstein RH, Hofer IS, Salari V, Gabel E. Successful Implementation of a Perioperative Data Warehouse Using Another Hospital's Published Specification From Epic's Electronic Health Record System. *Anesth Analg* 2021;132(2):465-474. DOI: 10.1213/ane.0000000000004806.
54. Melnick ER, Holland WC, Ahmed OM, et al. An integrated web application for decision support and automation of EHR workflow: a case study of current challenges to standards-based messaging and scalability from the EMBED trial. *JAMIA Open* 2019;2(4):434-439. DOI: 10.1093/jamiaopen/ooz053.
55. Stowell KR, Florence P, Harman HJ, Glick RL. Psychiatric evaluation of the agitated patient: consensus statement of the american association for emergency psychiatry project Beta psychiatric evaluation workgroup. *West J Emerg Med* 2012;13(1):11-6. DOI: 10.5811/westjem.2011.9.6868.
56. Swift RH, Harrigan EP, Cappelleri JC, Kramer D, Chandler LP. Validation of the behavioural activity rating scale (BARS): a novel measure of activity in agitated patients. *J Psychiatr Res* 2002;36(2):87-95. DOI: 10.1016/s0022-3956(01)00052-8.
57. Cho H, Keenan G, Madandola OO, et al. Assessing the Usability of a Clinical Decision Support System: Heuristic Evaluation. *JMIR Hum Factors* 2022;9(2):e31758. DOI: 10.2196/31758.
58. Pope C, Ziebland S, Mays N. Qualitative research in health care. *Analysing qualitative data*. *BMJ* 2000;320(7227):114-6. DOI: 10.1136/bmj.320.7227.114.
59. Bangor A, Kortum PT, Miller JT. An Empirical Evaluation of the System Usability Scale. *International Journal of Human-Computer Interaction* 2008;24:574 - 594.
60. Lewis JR. The System Usability Scale: Past, Present, and Future. *International Journal of Human-Computer Interaction* 2018;34(7):577-590. DOI: 10.1080/10447318.2018.1455307.
61. Lucero A. Using Affinity Diagrams to Evaluate Interactive Prototypes. *Human-Computer Interaction – INTERACT 2015*: Springer-Verlag; 2022:231–248.
62. Beyer H, Holtzblatt K. *Contextual Design: Defining Customer-Centered Systems*: Morgan Kaufmann Publishers Inc., 1997.
63. Ho J, Aridor O, Parwani AV. Use of contextual inquiry to understand anatomic pathology workflow: Implications for digital pathology adoption. *J Pathol Inform* 2012;3:35. DOI: 10.4103/2153-3539.101794.
64. van den Driesche C, Kerklaan S. The value of visual co-analysis models for an inclusive citizen science approach. Inspired by co-creation methods from design thinking. *fteval JOURNAL for Research and Technology Policy Evaluation* 2022(54):51-60. DOI: 10.22163/fteval.2022.571.
65. Hsieh HF, Shannon SE. Three approaches to qualitative content analysis. *Qual Health Res* 2005;15(9):1277-88. DOI: 10.1177/1049732305276687.
66. Holden RJ, Carayon P, Gurses AP, et al. SEIPS 2.0: a human factors framework for studying and improving the work of healthcare professionals and patients. *Ergonomics* 2013;56(11):1669-86. DOI: 10.1080/00140139.2013.838643.
67. Talanquer V. *Using Qualitative Analysis Software To Facilitate Qualitative Data Analysis*. *Tools of Chemistry Education Research*: American Chemical Society; 2014:83-95.
68. Jenssen BP, Bryant-Stephens T, Leone FT, Grundmeier RW, Fiks AG. Clinical Decision Support Tool for Parental Tobacco Treatment in Primary Care. *Pediatrics* 2016;137(5). DOI: 10.1542/peds.2015-4185.
69. Collingridge DS, Gantt EE. The quality of qualitative research. *Am J Med Qual* 2008;23(5):389-95. DOI: 10.1177/1062860608320646.
70. Curry LA, Nembhard IM, Bradley EH. Qualitative and mixed methods provide unique contributions to outcomes research. *Circulation* 2009;119(10):1442-52. DOI: 10.1161/circulationaha.107.742775.
71. Ranney ML, Meisel ZF, Choo EK, Garro AC, Sasson C, Morrow Guthrie K. Interview-based Qualitative Research in Emergency Care Part II: Data Collection, Analysis and Results Reporting. *Acad Emerg Med* 2015;22(9):1103-12. DOI: 10.1111/acem.12735.

- 1  
2  
3  
4  
5  
6  
7  
8  
9  
10  
11  
12  
13  
14  
15  
16  
17  
18  
19  
20  
21  
22  
23  
24  
25  
26  
27  
28  
29  
30  
31  
32  
33  
34  
35  
36  
37  
38  
39  
40  
41  
42  
43  
44  
45  
46  
47  
48  
49  
50  
51  
52  
53  
54  
55  
56  
57  
58  
59  
60
72. Guest G, Namey E, McKenna K. How Many Focus Groups Are Enough? Building an Evidence Base for Nonprobability Sample Sizes. *Field Methods* 2016;29. DOI: 10.1177/1525822x16639015.
73. Kushniruk AW, Patel VL. Cognitive and usability engineering methods for the evaluation of clinical information systems. *J Biomed Inform* 2004;37(1):56-76. DOI: 10.1016/j.jbi.2004.01.003.
74. Ray JM, Ahmed OM, Solad Y, et al. Computerized Clinical Decision Support System for Emergency Department-Initiated Buprenorphine for Opioid Use Disorder: User-Centered Design. *JMIR Hum Factors* 2019;6(1):e13121. DOI: 10.2196/13121.
75. Lancaster GA, Dodd S, Williamson PR. Design and analysis of pilot studies: recommendations for good practice. *J Eval Clin Pract* 2004;10(2):307-12. DOI: 10.1111/j..2002.384.doc.x.
76. Thabane L, Ma J, Chu R, et al. A tutorial on pilot studies: the what, why and how. *BMC Med Res Methodol* 2010;10:1. DOI: 10.1186/1471-2288-10-1.
77. Weiss SJ, Ernst AA, Nick TG. Comparison of the National Emergency Department Overcrowding Scale and the Emergency Department Work Index for quantifying emergency department crowding. *Acad Emerg Med* 2006;13(5):513-8. DOI: 10.1197/j.aem.2005.12.009.

1 **Figure titles**  
2  
3  
4

5 **Figure 1.** Overview and steps for each phase of ED-TREAT design and pilot implementation study

6 **Figure 2.** Overview and steps for Aim 1: ED-TREAT user-centered design and prototype development  
7

8 **Figure 3.** Anticipated clinical steps for the intervention arm of ED-TREAT  
9  
10  
11  
12  
13  
14  
15  
16  
17  
18  
19  
20  
21  
22  
23  
24  
25  
26  
27  
28  
29  
30  
31  
32  
33  
34  
35  
36  
37  
38  
39  
40  
41  
42  
43  
44  
45  
46  
47  
48  
49  
50  
51  
52  
53  
54  
55  
56  
57  
58  
59  
60

For peer review only



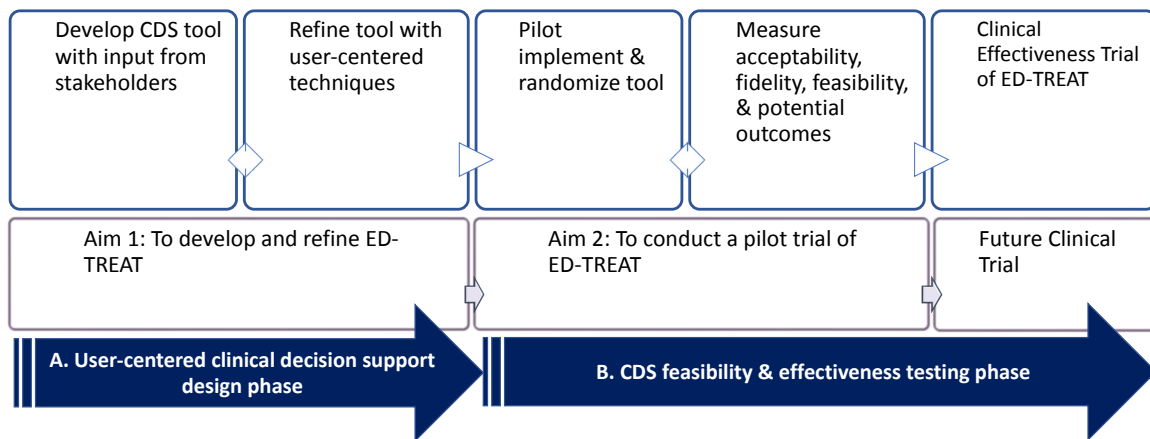

Peer review only

1  
2  
3  
4  
5  
6  
7  
8  
9  
10  
11  
12  
13  
14  
15  
16  
17  
18  
19  
20  
21  
22  
23  
24  
25  
26  
27  
28  
29  
30  
31  
32  
33  
34  
35  
36  
37  
38  
39  
40  
41  
42  
43  
44  
45  
46  
47  
48  
49  
50  
51  
52  
53  
54  
55  
56  
57  
58  
59  
60

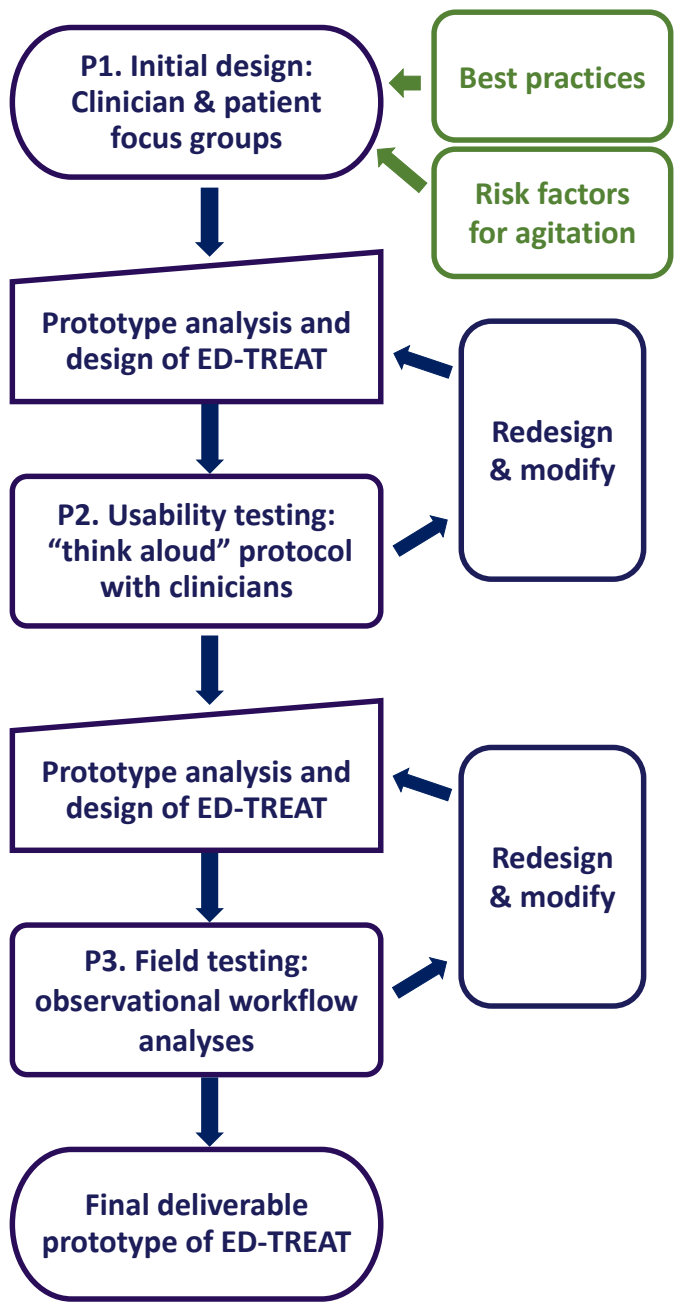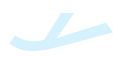

1  
2  
3  
4  
5  
6  
7  
8  
9  
10  
11  
12  
13  
14  
15  
16  
17  
18  
19  
20  
21  
22  
23  
24  
25  
26  
27  
28  
29  
30  
31  
32  
33  
34  
35  
36  
37  
38  
39  
40  
41  
42  
43  
44  
45  
46  
47  
48  
49  
50  
51  
52  
53  
54  
55  
56  
57  
58  
59  
60

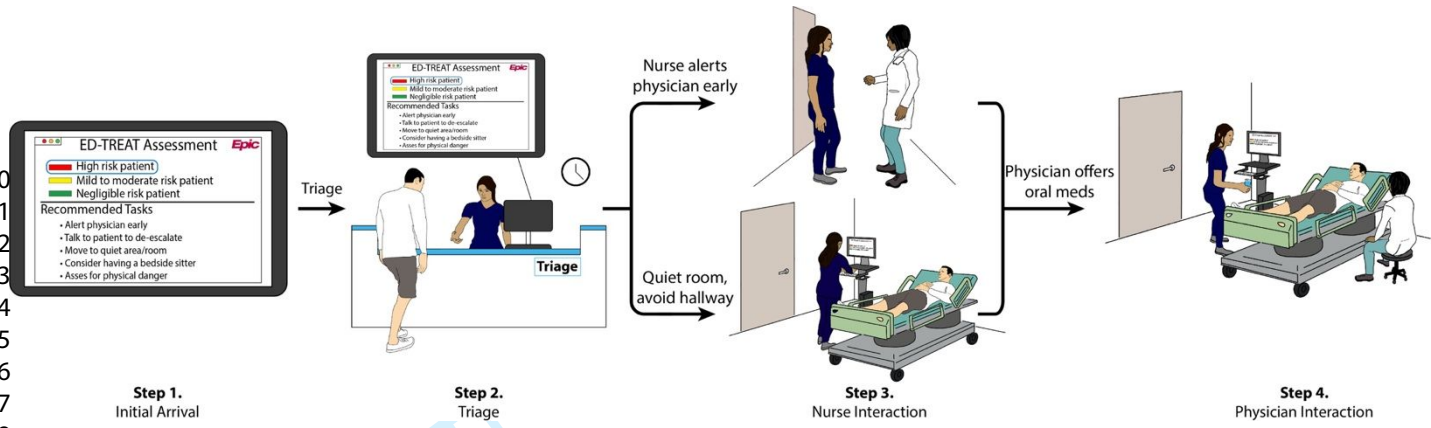

For peer review only

1  
2  
3  
4  
5  
6  
7  
8  
9  
10  
11  
12  
13  
14  
15  
16  
17

| Design Domain <sup>51</sup> | Example factors and sample question prompts                                                                                                                                                                                                                                                                                                                    |
|-----------------------------|----------------------------------------------------------------------------------------------------------------------------------------------------------------------------------------------------------------------------------------------------------------------------------------------------------------------------------------------------------------|
| User groups                 | <ul style="list-style-type: none"> <li>• Timing, benefits &amp; obstacles to using CDS for managing at-risk patients</li> <li>• Attitudes, beliefs, &amp; knowledge regarding treatment of at-risk patients</li> <li>• Potential impact of ED-TREAT on patient experience and needs during visit</li> </ul>                                                    |
| Tasks and technology        | <ul style="list-style-type: none"> <li>• Potential formats and interfaces for ED-TREAT prototype</li> <li>• Types of data and information to be included in ED-TREAT</li> <li>• Clinician interface with EHR and clinical duties related to ED-TREAT recommendations</li> </ul>                                                                                |
| System and organization     | <ul style="list-style-type: none"> <li>• Potential effect of ED-TREAT on management of at-risk patients</li> <li>• Workflow and care coordination amongst team members that can impact ED-TREAT across user types</li> <li>• Facilitators &amp; barriers to implementing best practices for preventing agitation in real-world clinical environment</li> </ul> |

18  
19  
20  
21  
22  
23  
24  
25  
26  
27  
28  
29  
30  
31  
32  
33

| Domain          | Data elements                                                                                                                                                                                                                                                                                                                                                                                                                             |
|-----------------|-------------------------------------------------------------------------------------------------------------------------------------------------------------------------------------------------------------------------------------------------------------------------------------------------------------------------------------------------------------------------------------------------------------------------------------------|
| Patient factors | <ul style="list-style-type: none"> <li>• Violence history: presence of violence alert, Brøset Violence Checklist (BVC)<sup>54</sup></li> <li>• History: chief complaint, psychiatric/medical history, alcohol/substance use, # ED visits/year, medications</li> </ul>                                                                                                                                                                     |
| Clinical data   | <ul style="list-style-type: none"> <li>• Laboratory data: complete blood count, urine toxicology, point-of-care glucose &amp; alcohol, basic metabolic panel</li> <li>• Initial vital signs: heart rate, temperature, systolic/diastolic blood pressures, oxygen saturation, respiratory rate</li> <li>• Restraint characteristics: type/route/dose of chemical sedative(s) used, reasons for &amp; type of physical restraint</li> </ul> |
| Environment     | <ul style="list-style-type: none"> <li>• Physical parameters: initial bed location assignment, hallway spot, time of day of presentation</li> <li>• Staff contact: initial staff contact, staff characteristics &amp; interactions, presence of security officers at arrival into ED</li> </ul>                                                                                                                                           |
| System          | <ul style="list-style-type: none"> <li>• Pre-arrival: mode of transport into ED, presence of law enforcement escort</li> <li>• Outpatient services: mental health visits, assertive community treatment, rehabilitation services</li> </ul>                                                                                                                                                                                               |

34  
35  
36  
37  
38  
39  
40  
41  
42  
43  
44  
45  
46  
47  
48  
49  
50  
51  
52  
53  
54  
55  
56  
57  
58  
59  
60

| Usability testing goals and objectives (P2)                                                                                                                                                                                                                                                                                                                                                                                                                                                                                                                                                                                           | Field testing observation task examples (P3)                                                                                                                                                                                                                                                                                                                                                                                                                                                                                   |
|---------------------------------------------------------------------------------------------------------------------------------------------------------------------------------------------------------------------------------------------------------------------------------------------------------------------------------------------------------------------------------------------------------------------------------------------------------------------------------------------------------------------------------------------------------------------------------------------------------------------------------------|--------------------------------------------------------------------------------------------------------------------------------------------------------------------------------------------------------------------------------------------------------------------------------------------------------------------------------------------------------------------------------------------------------------------------------------------------------------------------------------------------------------------------------|
| <ul style="list-style-type: none"> <li>• Effectiveness: Ability of users to achieve task goals</li> <li>• Efficiency: Time/speed to complete tasks within tool</li> <li>• Satisfaction: Ease of use &amp; acceptability of ED-TREAT</li> <li>• Understandability: Users comprehending what ED-TREAT can do</li> <li>• Learnability: Training/time/effort to learn how to use ED-TREAT</li> <li>• Operability: Support of user and overcoming potential problems</li> <li>• Flexibility: Ability to accommodate for different situations/needs</li> <li>• Attractiveness: Motivation of user interest to explore/use system</li> </ul> | <ul style="list-style-type: none"> <li>• Triage assessment and room assignment</li> <li>• Initial contact at bedside and assessment</li> <li>• Potential structural biases and differential treatment plans</li> <li>• History and physical exam, monitoring and re-assessment</li> <li>• De-escalation and establishing rapport</li> <li>• Ordering of medications, laboratory &amp; imaging tests</li> <li>• Patient behaviors, responses, experiences</li> <li>• EHR documentation &amp; interface with ED-TREAT</li> </ul> |

YALE UNIVERSITY  
YALE UNIVERSITY SCHOOL OF MEDICINE  
YALE-NEW HAVEN HOSPITAL

Verbal Consent for Participation in a Research Study

Title: Early Detection and Treatment to Reduce Events with Agitation Tool (ED-TREAT) Tool Development

Principal Investigator:

Ambrose Wong, MD, MEd

Assistant Professor of Emergency Medicine

Yale School of Medicine

464 Congress Ave Suite 260

New Haven, CT 06519

(203) 737-2489

[ambrose.wong@yale.edu](mailto:ambrose.wong@yale.edu)

### Introduction

You are being asked to join a research study. The following information will explain the purpose of the study, what you will be asked to do, and the potential risks and benefits. You should ask questions before deciding whether you wish to participate, or at any time during the course of the study. You will be asked to provide verbal consent to participate at the end of this process.

### Purpose

The purpose of this study is to develop and refine the Early Detection and Treatment to Reduce Events with Agitation Tool (ED-TREAT) by engaging patients in the process. ED-TREAT will be a clinical decision support tool in the electronic health record to help clinicians at the point of initial encounter in preventing agitation and aggressive behavior during a visit to the emergency department. We wish to receive input from patients directly for development and refinement of ED-TREAT during initial design of ED-TREAT.

You are being asked to participate because you work as a peer support worker and/or have been physically restrained as a patient in the emergency department (ED).

### Procedures

As part of this study, we will ask you to participate in a 60 to 90-minute online or in-person focus group where we will discuss your experience with agitation events, how a decision tool to detect agitation can impact/improve management of agitation, and what design for a clinical decision tool would best help prevention of agitation and/or your experience in the ED.

### Possible Risks

There are minimal risks to you for participation in this study. To protect your anonymity you will be assigned a study number and subsequently will be identified only through this number. Only research investigators will have access to the data. Electronic data will be maintained in password-protected files or on a password-protected online serve that only the PI and research assistant may access. All data will be maintained securely for three years after the conclusion of the study, at which time it will be permanently destroyed.

We are counting the numbers of participants, but assure you that your answers will be anonymized before they are analyzed by the research team. Your contributions will be secured and protected throughout the study and will remain confidential to everyone including the research team.

### Voluntary Participation

1 Participation in this study is completely voluntary. Your email response will count as verbal consent to participate. However,  
2 you are free to decline to participate, to end participation at any time for any reason, or to refuse to answer any individual  
3 question at any time. You may withdraw from the study at any time without negative consequences. Your responses and  
4 decision to participate or withdraw from participation will not affect your relationship with Yale School of Medicine, Yale-New  
5 Haven Health, or any affiliated locations of employment or healthcare delivery. You will only be asked to participate for one  
6 phase of the study and will not be required or asked again to join another phase of the study.  
7

## 8 9 10 Questions

11  
12 If you have any further questions about this study or the focus group questions, you may contact the investigator, Dr.  
13 Ambrose Wong, MD, MEd, at (203) 737-2489 or at [ambrose.wong@yale.edu](mailto:ambrose.wong@yale.edu). If you would like to talk with someone other  
14 than the researchers to discuss problems, concerns, and questions you may have concerning this research, or to discuss your  
15 rights as a research subject, you may contact the Yale Human Investigation Committee at (203) 785-4688.  
16  
17  
18  
19  
20  
21  
22  
23  
24  
25  
26  
27  
28  
29  
30  
31  
32  
33  
34  
35  
36  
37  
38  
39  
40  
41  
42  
43  
44  
45  
46  
47  
48  
49  
50  
51  
52  
53  
54  
55  
56  
57  
58  
59  
60

SPIRIT 2013 Checklist: Recommended items to address in a clinical trial protocol and related documents\*

| Section/item                      | Item No | Description                                                                                                                                                                                                                                                                              | Addressed on page number |
|-----------------------------------|---------|------------------------------------------------------------------------------------------------------------------------------------------------------------------------------------------------------------------------------------------------------------------------------------------|--------------------------|
| <b>Administrative information</b> |         |                                                                                                                                                                                                                                                                                          |                          |
| Title                             | 1       | Descriptive title identifying the study design, population, interventions, and, if applicable, trial acronym                                                                                                                                                                             | 1                        |
| Trial registration                | 2a      | Trial identifier and registry name. If not yet registered, name of intended registry                                                                                                                                                                                                     | 2                        |
|                                   | 2b      | All items from the World Health Organization Trial Registration Data Set                                                                                                                                                                                                                 | N/A                      |
| Protocol version                  | 3       | Date and version identifier                                                                                                                                                                                                                                                              | N/A                      |
| Funding                           | 4       | Sources and types of financial, material, and other support                                                                                                                                                                                                                              | 15-16                    |
| Roles and responsibilities        | 5a      | Names, affiliations, and roles of protocol contributors                                                                                                                                                                                                                                  | 1, 16                    |
|                                   | 5b      | Name and contact information for the trial sponsor                                                                                                                                                                                                                                       | 15                       |
|                                   | 5c      | Role of study sponsor and funders, if any, in study design; collection, management, analysis, and interpretation of data; writing of the report; and the decision to submit the report for publication, including whether they will have ultimate authority over any of these activities | 15-16                    |
|                                   | 5d      | Composition, roles, and responsibilities of the coordinating centre, steering committee, endpoint adjudication committee, data management team, and other individuals or groups overseeing the trial, if applicable (see Item 21a for data monitoring committee)                         | 15-16                    |

|    |                                                           |     |                                                                                                               |          |
|----|-----------------------------------------------------------|-----|---------------------------------------------------------------------------------------------------------------|----------|
| 1  | <b>Introduction</b>                                       |     |                                                                                                               |          |
| 2  |                                                           |     |                                                                                                               |          |
| 3  | Background and                                            | 6a  | Description of research question and justification for undertaking the trial, including summary of relevant   | 3-4      |
| 4  | rationale                                                 |     | studies (published and unpublished) examining benefits and harms for each intervention                        |          |
| 5  |                                                           |     |                                                                                                               |          |
| 6  |                                                           | 6b  | Explanation for choice of comparators                                                                         | 4        |
| 7  |                                                           |     |                                                                                                               |          |
| 8  | Objectives                                                | 7   | Specific objectives or hypotheses                                                                             | 4        |
| 9  |                                                           |     |                                                                                                               |          |
| 10 | Trial design                                              | 8   | Description of trial design including type of trial (eg, parallel group, crossover, factorial, single group), |          |
| 11 |                                                           |     | allocation ratio, and framework (eg, superiority, equivalence, noninferiority, exploratory)                   | 2, 9, 14 |
| 12 |                                                           |     |                                                                                                               |          |
| 13 |                                                           |     |                                                                                                               |          |
| 14 | <b>Methods: Participants, interventions, and outcomes</b> |     |                                                                                                               |          |
| 15 |                                                           |     |                                                                                                               |          |
| 16 | Study setting                                             | 9   | Description of study settings (eg, community clinic, academic hospital) and list of countries where data will | 4-5, 9   |
| 17 |                                                           |     | be collected. Reference to where list of study sites can be obtained                                          |          |
| 18 |                                                           |     |                                                                                                               |          |
| 19 | Eligibility criteria                                      | 10  | Inclusion and exclusion criteria for participants. If applicable, eligibility criteria for study centres and  | 9, 12    |
| 20 |                                                           |     | individuals who will perform the interventions (eg, surgeons, psychotherapists)                               |          |
| 21 |                                                           |     |                                                                                                               |          |
| 22 | Interventions                                             | 11a | Interventions for each group with sufficient detail to allow replication, including how and when they will be | 10, 12   |
| 23 |                                                           |     | administered                                                                                                  |          |
| 24 |                                                           |     |                                                                                                               |          |
| 25 |                                                           | 11b | Criteria for discontinuing or modifying allocated interventions for a given trial participant (eg, drug dose  | N/A      |
| 26 |                                                           |     | change in response to harms, participant request, or improving/worsening disease)                             |          |
| 27 |                                                           |     |                                                                                                               |          |
| 28 |                                                           | 11c | Strategies to improve adherence to intervention protocols, and any procedures for monitoring adherence        | N/A      |
| 29 |                                                           |     | (eg, drug tablet return, laboratory tests)                                                                    |          |
| 30 |                                                           |     |                                                                                                               |          |
| 31 |                                                           | 11d | Relevant concomitant care and interventions that are permitted or prohibited during the trial                 | N/A      |
| 32 |                                                           |     |                                                                                                               |          |
| 33 | Outcomes                                                  | 12  | Primary, secondary, and other outcomes, including the specific measurement variable (eg, systolic blood       | 12-13    |
| 34 |                                                           |     | pressure), analysis metric (eg, change from baseline, final value, time to event), method of aggregation (eg, |          |
| 35 |                                                           |     | median, proportion), and time point for each outcome. Explanation of the clinical relevance of chosen         |          |
| 36 |                                                           |     | efficacy and harm outcomes is strongly recommended                                                            |          |
| 37 |                                                           |     |                                                                                                               |          |
| 38 |                                                           |     |                                                                                                               |          |
| 39 |                                                           |     |                                                                                                               |          |
| 40 |                                                           |     |                                                                                                               |          |
| 41 |                                                           |     |                                                                                                               |          |
| 42 |                                                           |     |                                                                                                               |          |
| 43 |                                                           |     |                                                                                                               |          |
| 44 |                                                           |     |                                                                                                               |          |
| 45 |                                                           |     |                                                                                                               |          |
| 46 |                                                           |     |                                                                                                               |          |



|   |                      |    |                                                                                                                                                                                       |        |
|---|----------------------|----|---------------------------------------------------------------------------------------------------------------------------------------------------------------------------------------|--------|
| 1 | Participant timeline | 13 | Time schedule of enrolment, interventions (including any run-ins and washouts), assessments, and visits for participants. A schematic diagram is highly recommended (see Figure)      | 12-14  |
| 2 |                      |    |                                                                                                                                                                                       |        |
| 3 |                      |    |                                                                                                                                                                                       |        |
| 4 | Sample size          | 14 | Estimated number of participants needed to achieve study objectives and how it was determined, including clinical and statistical assumptions supporting any sample size calculations | 12-14  |
| 5 |                      |    |                                                                                                                                                                                       |        |
| 6 |                      |    |                                                                                                                                                                                       |        |
| 7 | Recruitment          | 15 | Strategies for achieving adequate participant enrolment to reach target sample size                                                                                                   | 12, 14 |
| 8 |                      |    |                                                                                                                                                                                       |        |
| 9 |                      |    |                                                                                                                                                                                       |        |

### 10 **Methods: Assignment of interventions (for controlled trials)**

#### 11 Allocation:

|    |                                  |     |                                                                                                                                                                                                                                                                                                                                                          |     |
|----|----------------------------------|-----|----------------------------------------------------------------------------------------------------------------------------------------------------------------------------------------------------------------------------------------------------------------------------------------------------------------------------------------------------------|-----|
| 12 |                                  |     |                                                                                                                                                                                                                                                                                                                                                          |     |
| 13 |                                  |     |                                                                                                                                                                                                                                                                                                                                                          |     |
| 14 | Sequence generation              | 16a | Method of generating the allocation sequence (eg, computer-generated random numbers), and list of any factors for stratification. To reduce predictability of a random sequence, details of any planned restriction (eg, blocking) should be provided in a separate document that is unavailable to those who enrol participants or assign interventions | 12  |
| 15 |                                  |     |                                                                                                                                                                                                                                                                                                                                                          |     |
| 16 |                                  |     |                                                                                                                                                                                                                                                                                                                                                          |     |
| 17 |                                  |     |                                                                                                                                                                                                                                                                                                                                                          |     |
| 18 |                                  |     |                                                                                                                                                                                                                                                                                                                                                          |     |
| 19 | Allocation concealment mechanism | 16b | Mechanism of implementing the allocation sequence (eg, central telephone; sequentially numbered, opaque, sealed envelopes), describing any steps to conceal the sequence until interventions are assigned                                                                                                                                                | 12  |
| 20 |                                  |     |                                                                                                                                                                                                                                                                                                                                                          |     |
| 21 |                                  |     |                                                                                                                                                                                                                                                                                                                                                          |     |
| 22 |                                  |     |                                                                                                                                                                                                                                                                                                                                                          |     |
| 23 |                                  |     |                                                                                                                                                                                                                                                                                                                                                          |     |
| 24 | Implementation                   | 16c | Who will generate the allocation sequence, who will enrol participants, and who will assign participants to interventions                                                                                                                                                                                                                                | 12  |
| 25 |                                  |     |                                                                                                                                                                                                                                                                                                                                                          |     |
| 26 |                                  |     |                                                                                                                                                                                                                                                                                                                                                          |     |
| 27 | Blinding (masking)               | 17a | Who will be blinded after assignment to interventions (eg, trial participants, care providers, outcome assessors, data analysts), and how                                                                                                                                                                                                                | N/A |
| 28 |                                  |     |                                                                                                                                                                                                                                                                                                                                                          |     |
| 29 |                                  |     |                                                                                                                                                                                                                                                                                                                                                          |     |
| 30 |                                  | 17b | If blinded, circumstances under which unblinding is permissible, and procedure for revealing a participant's allocated intervention during the trial                                                                                                                                                                                                     | N/A |
| 31 |                                  |     |                                                                                                                                                                                                                                                                                                                                                          |     |
| 32 |                                  |     |                                                                                                                                                                                                                                                                                                                                                          |     |
| 33 |                                  |     |                                                                                                                                                                                                                                                                                                                                                          |     |

### 34 **Methods: Data collection, management, and analysis**

|    |                         |     |                                                                                                                                                                                                                                                                                                                                                                                                              |      |
|----|-------------------------|-----|--------------------------------------------------------------------------------------------------------------------------------------------------------------------------------------------------------------------------------------------------------------------------------------------------------------------------------------------------------------------------------------------------------------|------|
| 35 |                         |     |                                                                                                                                                                                                                                                                                                                                                                                                              |      |
| 36 | Data collection methods | 18a | Plans for assessment and collection of outcome, baseline, and other trial data, including any related processes to promote data quality (eg, duplicate measurements, training of assessors) and a description of study instruments (eg, questionnaires, laboratory tests) along with their reliability and validity, if known. Reference to where data collection forms can be found, if not in the protocol | 4-14 |
| 37 |                         |     |                                                                                                                                                                                                                                                                                                                                                                                                              |      |
| 38 |                         |     |                                                                                                                                                                                                                                                                                                                                                                                                              |      |
| 39 |                         |     |                                                                                                                                                                                                                                                                                                                                                                                                              |      |
| 40 |                         |     |                                                                                                                                                                                                                                                                                                                                                                                                              |      |
| 41 |                         |     |                                                                                                                                                                                                                                                                                                                                                                                                              |      |
| 42 |                         |     |                                                                                                                                                                                                                                                                                                                                                                                                              |      |

|    |                     |     |                                                                                                                                                                                                                                                                   |           |
|----|---------------------|-----|-------------------------------------------------------------------------------------------------------------------------------------------------------------------------------------------------------------------------------------------------------------------|-----------|
| 1  |                     | 18b | Plans to promote participant retention and complete follow-up, including list of any outcome data to be collected for participants who discontinue or deviate from intervention protocols                                                                         | 12-14     |
| 2  |                     |     |                                                                                                                                                                                                                                                                   |           |
| 3  |                     |     |                                                                                                                                                                                                                                                                   |           |
| 4  | Data management     | 19  | Plans for data entry, coding, security, and storage, including any related processes to promote data quality (eg, double data entry; range checks for data values). Reference to where details of data management procedures can be found, if not in the protocol | 8-10      |
| 5  |                     |     |                                                                                                                                                                                                                                                                   |           |
| 6  |                     |     |                                                                                                                                                                                                                                                                   |           |
| 7  |                     |     |                                                                                                                                                                                                                                                                   |           |
| 8  | Statistical methods | 20a | Statistical methods for analysing primary and secondary outcomes. Reference to where other details of the statistical analysis plan can be found, if not in the protocol                                                                                          | 8, 10, 11 |
| 9  |                     |     |                                                                                                                                                                                                                                                                   |           |
| 10 |                     |     |                                                                                                                                                                                                                                                                   |           |
| 11 |                     | 20b | Methods for any additional analyses (eg, subgroup and adjusted analyses)                                                                                                                                                                                          | N/A       |
| 12 |                     |     |                                                                                                                                                                                                                                                                   |           |
| 13 |                     | 20c | Definition of analysis population relating to protocol non-adherence (eg, as randomised analysis), and any statistical methods to handle missing data (eg, multiple imputation)                                                                                   | N/A       |
| 14 |                     |     |                                                                                                                                                                                                                                                                   |           |
| 15 |                     |     |                                                                                                                                                                                                                                                                   |           |
| 16 |                     |     |                                                                                                                                                                                                                                                                   |           |
| 17 |                     |     |                                                                                                                                                                                                                                                                   |           |
| 18 |                     |     |                                                                                                                                                                                                                                                                   |           |
| 19 |                     |     |                                                                                                                                                                                                                                                                   |           |
| 20 |                     |     |                                                                                                                                                                                                                                                                   |           |

**Methods: Monitoring**

|    |                 |     |                                                                                                                                                                                                                                                                                                                                       |       |
|----|-----------------|-----|---------------------------------------------------------------------------------------------------------------------------------------------------------------------------------------------------------------------------------------------------------------------------------------------------------------------------------------|-------|
| 23 | Data monitoring | 21a | Composition of data monitoring committee (DMC); summary of its role and reporting structure; statement of whether it is independent from the sponsor and competing interests; and reference to where further details about its charter can be found, if not in the protocol. Alternatively, an explanation of why a DMC is not needed | 14-15 |
| 24 |                 |     |                                                                                                                                                                                                                                                                                                                                       |       |
| 25 |                 | 21b | Description of any interim analyses and stopping guidelines, including who will have access to these interim results and make the final decision to terminate the trial                                                                                                                                                               | N/A   |
| 26 |                 |     |                                                                                                                                                                                                                                                                                                                                       |       |
| 27 |                 |     |                                                                                                                                                                                                                                                                                                                                       |       |
| 28 |                 |     |                                                                                                                                                                                                                                                                                                                                       |       |
| 29 | Harms           | 22  | Plans for collecting, assessing, reporting, and managing solicited and spontaneously reported adverse events and other unintended effects of trial interventions or trial conduct                                                                                                                                                     | 14-15 |
| 30 |                 |     |                                                                                                                                                                                                                                                                                                                                       |       |
| 31 |                 |     |                                                                                                                                                                                                                                                                                                                                       |       |
| 32 | Auditing        | 23  | Frequency and procedures for auditing trial conduct, if any, and whether the process will be independent from investigators and the sponsor                                                                                                                                                                                           | N/A   |
| 33 |                 |     |                                                                                                                                                                                                                                                                                                                                       |       |
| 34 |                 |     |                                                                                                                                                                                                                                                                                                                                       |       |
| 35 |                 |     |                                                                                                                                                                                                                                                                                                                                       |       |
| 36 |                 |     |                                                                                                                                                                                                                                                                                                                                       |       |
| 37 |                 |     |                                                                                                                                                                                                                                                                                                                                       |       |
| 38 |                 |     |                                                                                                                                                                                                                                                                                                                                       |       |

**Ethics and dissemination**

|    |                               |     |                                                                                                                                                                                                                                                                                     |              |
|----|-------------------------------|-----|-------------------------------------------------------------------------------------------------------------------------------------------------------------------------------------------------------------------------------------------------------------------------------------|--------------|
| 1  | Research ethics approval      | 24  | Plans for seeking research ethics committee/institutional review board (REC/IRB) approval                                                                                                                                                                                           | 14-15        |
| 2  |                               |     |                                                                                                                                                                                                                                                                                     |              |
| 3  |                               |     |                                                                                                                                                                                                                                                                                     |              |
| 4  | Protocol amendments           | 25  | Plans for communicating important protocol modifications (eg, changes to eligibility criteria, outcomes, analyses) to relevant parties (eg, investigators, REC/IRBs, trial participants, trial registries, journals, regulators)                                                    | 9, 11, 14-15 |
| 5  |                               |     |                                                                                                                                                                                                                                                                                     |              |
| 6  |                               |     |                                                                                                                                                                                                                                                                                     |              |
| 7  |                               |     |                                                                                                                                                                                                                                                                                     |              |
| 8  | Consent or assent             | 26a | Who will obtain informed consent or assent from potential trial participants or authorised surrogates, and how (see Item 32)                                                                                                                                                        | 12, 14-15    |
| 9  |                               |     |                                                                                                                                                                                                                                                                                     |              |
| 10 |                               |     |                                                                                                                                                                                                                                                                                     |              |
| 11 |                               | 26b | Additional consent provisions for collection and use of participant data and biological specimens in ancillary studies, if applicable                                                                                                                                               | N/A          |
| 12 |                               |     |                                                                                                                                                                                                                                                                                     |              |
| 13 |                               |     |                                                                                                                                                                                                                                                                                     |              |
| 14 | Confidentiality               | 27  | How personal information about potential and enrolled participants will be collected, shared, and maintained in order to protect confidentiality before, during, and after the trial                                                                                                | 14-15        |
| 15 |                               |     |                                                                                                                                                                                                                                                                                     |              |
| 16 |                               |     |                                                                                                                                                                                                                                                                                     |              |
| 17 |                               |     |                                                                                                                                                                                                                                                                                     |              |
| 18 | Declaration of interests      | 28  | Financial and other competing interests for principal investigators for the overall trial and each study site                                                                                                                                                                       | 16           |
| 19 |                               |     |                                                                                                                                                                                                                                                                                     |              |
| 20 |                               |     |                                                                                                                                                                                                                                                                                     |              |
| 21 | Access to data                | 29  | Statement of who will have access to the final trial dataset, and disclosure of contractual agreements that limit such access for investigators                                                                                                                                     | 14-15        |
| 22 |                               |     |                                                                                                                                                                                                                                                                                     |              |
| 23 |                               |     |                                                                                                                                                                                                                                                                                     |              |
| 24 | Ancillary and post-trial care | 30  | Provisions, if any, for ancillary and post-trial care, and for compensation to those who suffer harm from trial participation                                                                                                                                                       | N/A          |
| 25 |                               |     |                                                                                                                                                                                                                                                                                     |              |
| 26 |                               |     |                                                                                                                                                                                                                                                                                     |              |
| 27 | Dissemination policy          | 31a | Plans for investigators and sponsor to communicate trial results to participants, healthcare professionals, the public, and other relevant groups (eg, via publication, reporting in results databases, or other data sharing arrangements), including any publication restrictions | 15           |
| 28 |                               |     |                                                                                                                                                                                                                                                                                     |              |
| 29 |                               | 31b | Authorship eligibility guidelines and any intended use of professional writers                                                                                                                                                                                                      | N/A          |
| 30 |                               |     |                                                                                                                                                                                                                                                                                     |              |
| 31 |                               | 31c | Plans, if any, for granting public access to the full protocol, participant-level dataset, and statistical code                                                                                                                                                                     | 15           |
| 32 |                               |     |                                                                                                                                                                                                                                                                                     |              |
| 33 |                               |     |                                                                                                                                                                                                                                                                                     |              |
| 34 |                               |     |                                                                                                                                                                                                                                                                                     |              |
| 35 |                               |     |                                                                                                                                                                                                                                                                                     |              |
| 36 | <b>Appendices</b>             |     |                                                                                                                                                                                                                                                                                     |              |
| 37 |                               |     |                                                                                                                                                                                                                                                                                     |              |
| 38 | Informed consent materials    | 32  | Model consent form and other related documentation given to participants and authorised surrogates                                                                                                                                                                                  | N/A          |
| 39 |                               |     |                                                                                                                                                                                                                                                                                     |              |
| 40 |                               |     |                                                                                                                                                                                                                                                                                     |              |
| 41 |                               |     |                                                                                                                                                                                                                                                                                     |              |
| 42 |                               |     |                                                                                                                                                                                                                                                                                     |              |
| 43 |                               |     |                                                                                                                                                                                                                                                                                     |              |
| 44 |                               |     |                                                                                                                                                                                                                                                                                     |              |
| 45 |                               |     |                                                                                                                                                                                                                                                                                     |              |
| 46 |                               |     |                                                                                                                                                                                                                                                                                     |              |

|   |            |    |                                                                                                           |     |
|---|------------|----|-----------------------------------------------------------------------------------------------------------|-----|
| 1 | Biological | 33 | Plans for collection, laboratory evaluation, and storage of biological specimens for genetic or molecular | N/A |
| 2 | specimens  |    | analysis in the current trial and for future use in ancillary studies, if applicable                      |     |

---

4 \*It is strongly recommended that this checklist be read in conjunction with the SPIRIT 2013 Explanation & Elaboration for important clarification on the items.  
5 Amendments to the protocol should be tracked and dated. The SPIRIT checklist is copyrighted by the SPIRIT Group under the Creative Commons  
6 “Attribution-NonCommercial-NoDerivs 3.0 Unported” license.  
7

For peer review only

8  
9  
10  
11  
12  
13  
14  
15  
16  
17  
18  
19  
20  
21  
22  
23  
24  
25  
26  
27  
28  
29  
30  
31  
32  
33  
34  
35  
36  
37  
38  
39  
40  
41  
42  
43  
44  
45  
46
