# Supplementary material for: Formative evaluation of an emergency department clinical decision support system for agitation symptoms: a study protocol
Source: PubMed Central journal article supplement — BMJ Open. 2024 Feb 19;14(2):e082834. doi: 10.1136/bmjopen-2023-082834 (PMC10882402; doi:10.1136/bmjopen-2023-082834), 2024-02-19
Supplement: bmjopen-2023-082834.reviewer_comments.pdf [file bmjopen-2023-082834.reviewer_comments.pdf]

## PEER REVIEW HISTORY

BMJ Open publishes all reviews undertaken for accepted manuscripts. Reviewers are asked to complete a checklist review form (<http://bmjopen.bmj.com/site/about/resources/checklist.pdf>) and are provided with free text boxes to elaborate on their assessment. These free text comments are reproduced below.

## ARTICLE DETAILS

|                            |                                                                                                                                                                                                                                                                                    |
|----------------------------|------------------------------------------------------------------------------------------------------------------------------------------------------------------------------------------------------------------------------------------------------------------------------------|
| <b>TITLE (PROVISIONAL)</b> | Formative evaluation of an emergency department clinical decision support system for agitation symptoms: a study protocol                                                                                                                                                          |
| <b>AUTHORS</b>             | Wong, Ambrose; Nath, Bidisha; Shah, Dhruvil; Kumar, Anusha; Brinker, Morgan; Faustino, Isaac; Boyce, Michael; Dziura, James; Heckmann, Rebekah; Yonkers, Kimberly A.; Bernstein, Steven L.; Adapa, Karthik; Taylor, Richard; Ovchinnikova, Polina; McCall, Terika; Melnick, Edward |

This article was not externally reviewed at BMJ Open. Protocols that have been independently assessed prior to submission to BMJ Open are usually fast-tracked to publication on the grounds that further substantial changes will not be possible. This independent assessment will usually be external, independent review for both a substantial grant award from a non-commercial or government funder and ethics approval.
